1

## 2 **Cohort-specific serological recognition of SARS-CoV-2 variant RBD antigens**

3 Douglas D. Fraser<sup>a,b,c,d</sup>, Michael R. Miller<sup>a,b</sup>, Claudio M. Martin<sup>b,e</sup>, Marat Slessarev<sup>b,e</sup>, Paul Hahn<sup>f</sup>, Ian Higgins<sup>f</sup>,  
4 Christopher Melo<sup>f</sup>, Michael A. Pest<sup>f</sup>, Nate Rothery<sup>f</sup>, Xiaoqin Wang<sup>f</sup>, Johannes Zeidler<sup>f</sup>, Jorge A. Cruz-Aguado<sup>f\*</sup>.

5 a. Lawson Health Research Institute, London, ON N6C 2R5, Canada

6 b. Department of Pediatrics, Western University, London, ON N6A 3K7, Canada

7 c. Department of Clinical Neurological Sciences, Western University, London, ON N6A 3K7, Canada

8 d. Department of Physiology & Pharmacology, Western University, London, ON N6A 3K7, Canada

9 e. Lawson Health Research Institute, London, ON N6C 2R5, Canada

10 f. Diagnostics Biochem Canada Inc, London, ON N6M 1A1, Canada

11 \*Corresponding author.

12

### 13 **Abstract**

14

15 **Background:** Estimating the response of different cohorts (e.g. vaccinated or critically ill) to new SARS-CoV-2  
16 variants is important to customize measures of control. Thus, our goal was to evaluate binding of antibodies  
17 from sera of infected and vaccinated people to different antigens expressed by SARS-CoV-2 variants.

18 **Methods:** We compared sera from vaccinated donors with sera from four patient/donor cohorts: critically ill  
19 patients admitted to an intensive care unit (split in sera collected between 2 and 7 days after admission and  
20 more than ten days later), a NIBSC/WHO reference panel of SARS-CoV-2 positive individuals, and ambulatory  
21 or hospitalized (but not critically ill) positive donors. Samples were tested with an anti-SARS-CoV-2 IgG  
22 serological assay designed with microplates coated with a SARS-CoV-2 RBD recombinant antigen. The same  
23 sample sets were also tested with microplates coated with antigens harbouring RBD mutations present in  
24 eleven of the most widespread variants.

25 **Results:** Sera from vaccinated individuals exhibited higher antibody binding ( $P < 0.001$ ) than sera from infected  
26 (but not critically ill) individuals when tested against the WT and each of 11 variants' RBD.

27 The optical density generated by sera from non-critically ill convalescence individuals upon binding to variant's  
28 antigens was different ( $P < 0.05$ ) from that of the WT in some variants—noteworthy, Beta, Gamma, Delta, and  
29 Delta Plus variants.

30 **Conclusions:** Understanding differences in binding and neutralizing antibody titers against WT vs variant RBD  
31 antigens from different donor cohorts can help design variant-specific immunoassays and complement other  
32 diagnostic and clinical data to evaluate the epidemiology of new variants.

33 **Key Words:** COVID-19; SARS-CoV-2 vaccine; SARS-CoV-2 variants; RBD mutations; antibody specificity;  
34 critically ill, immunoassays, serology.

1

## 35 **Introduction**

36 The race to understand the impact of new variants of the SARS-CoV-2 virus on the effectiveness of antibody  
37 therapeutics, vaccines, and infection-elicited antibody responses has led to an unprecedented number of  
38 converging studies, the majority showing that most potent 'immune escape' mutations are in the receptor-  
39 binding motif (RBM), a region located within the receptor binding domain (RBD) of SARS-CoV-2's spike protein  
40 [1]. Indeed, approximately 90% of plasma or serum neutralizing antibody activity targets the RBD [2] and  
41 structural data support that RBD-based vaccines have a competitive position to deliver a fast response to the  
42 COVID-19 pandemic [3].

43 Until now, a trend has been delineated for the most frequent Variants of Concern (VOC) B.1.1.7 (Alpha), B.1.351  
44 (Beta), P.1 (Gamma) and B.1.617.2 (Delta) [4]. Some reports concur that sera from vaccinated or COVID-19  
45 convalescent patients can efficiently neutralize viruses with just the N501Y mutation in the RBD, however,  
46 variants including the E484K mutation render sera from both wild type (WT) infected and vaccinated patients  
47 less efficient at virus neutralization [4-9]. Variants with sentinel mutation N439K decrease the activity of both  
48 polyclonal convalescent sera and monoclonal antibodies from individuals recovering from infection [10]. Another  
49 RBD mutation, L452R, present in variants B.1.429 and B.1.427 (Epsilon), and Indian Delta variant B.1.617.2  
50 (Table 1), is thought to increase viral infectivity and potentially promote viral replication [11-15].

51 The published research, however, has scarcely addressed differences between naturally infected individuals of  
52 the general population, critically ill hospitalized patients, and vaccinated subjects in the response to new  
53 variants.

54 Personalizing the response to new variants of the virus is important to optimize measures of control; for  
55 example, as precautionary warnings for travel within regions with a prevalent variant, or to better triage the  
56 selection of individuals who should be prioritized for vaccination. Although neutralization assays could provide  
57 answers to those questions, they are expensive and time consuming for practical testing of the population.

58 In this study, we set out to investigate first, how the recognition pattern of WT SARS-CoV-2 RBD antibodies  
59 generated by vaccination distinguishes those patients compared to the recognition pattern of individuals after  
60 infection, and furthermore, determine how this recognition pattern differs when these antibodies are presented  
61 with the mutated variant-associated SARS-CoV-2 RBD proteins. Secondly, we aimed to examine whether  
62 recognition of variant specific RBD differs between vaccine sera and antibodies produced by different post-  
63 infection cohorts, information that could complement clinical data with variant-specific immunoassay-based

64 screenings to evaluate the potential epidemiological impact of new variants on previously infected and  
65 vaccinated cohorts.

## 66 **Methods**

### 67 **Study population and Ethics**

68 We used SARS-CoV-2 serum positive samples from:

69 **a) Donors vaccinated with mRNA vaccines.** Commercial samples from individuals who were vaccinated with  
70 two doses of either the Moderna mRNA-1273 or the Pfizer BioNTech COVID-19 vaccines during the first 3  
71 months of 2021. The donor's serum was collected before and after the first and second doses.

72 **b) Critically-ill patients** (split in sera collected between 2 and 7 days after admission and more than ten days  
73 later). Samples came from patients admitted to the level-3 academic ICU at London Health Sciences Centre  
74 (London, Ontario), confirmed as COVID-19 with standard hospital testing by detection of two SARS-CoV-2 viral  
75 genes using polymerase chain reaction [16].

76 **c) NIBSC/WHO reference panel of SARS-CoV-2 positive donors** from the NIBSC/WHO reference panels.

77 **d) Non-critically ill positive patient samples.** Commercial samples were collected during 2020. Donors were  
78 ambulatory or hospitalized patients (AHP) COVID-19 positive based on RT-PCR tests and immunoassays and  
79 tested again with the ELISA kit of this study. Three donors were hospitalized (not critically ill) and released.

80 Commercial samples were sourced through Access Biologicals (Vista, California, USA), Lampire Biological  
81 Laboratories (Pipersville, PA, USA), or Plasma Services Group, Inc (Moorestown, NJ, USA), each of which  
82 confirmed patient consent and participation in an Institutional Review Board (IRB) approved protocol. For  
83 critically ill patient recruitment, waived consent was approved for a short, defined period (Western University,  
84 Research Ethics Board [REB] number 1670). Samples obtained through the WHO database were originally  
85 collected under WHO protocols and ethical considerations, and specifics are publicly available online via links  
86 provided in S4. Ultimately, all patient samples were approved for research use by their respective sources.  
87 Furthermore, all samples were assigned arbitrary Sample ID's to further anonymize personal data. Additional  
88 information available on request.

89 Samples were collected in North America before the global spread of the variants. We inferred that most of the  
90 studied positive specimens harbored antibodies raised against the WT virus, likely WA1/2020 (summarized in

91 Table 1). More detailed information about each sample and the demographics, infection/vaccination timeline,  
 92 and patient outcomes can be viewed in Supplemental Tables S1-S4.

93  
 94 **Table 1.** Summary of serum specimens used in this study. Additional patient data provided in Supplemental  
 95 Material (Tables S1-S5).

| Cohort                                                    | Number of serum samples | Age range |         | Number of days between vaccine immunization or detected infection and blood draw |        |         | Date of last drawn sample      |
|-----------------------------------------------------------|-------------------------|-----------|---------|----------------------------------------------------------------------------------|--------|---------|--------------------------------|
|                                                           |                         |           |         | Median                                                                           | Range  |         |                                |
|                                                           |                         | Minimum   | Maximum |                                                                                  | Lowest | Highest |                                |
| Vaccinated                                                | 60                      | 19        | 76      | 14                                                                               | 12     | 17      | April 6 <sup>th</sup> , 2021   |
| ICU patients, 2 - 7 days                                  | 30                      | 37        | 85      | 4.5 <sup>a</sup>                                                                 | 2      | 7       | August 10 <sup>th</sup> , 2020 |
| ICU patients, 10+ days                                    | 15                      | 45        | 77      | 16 <sup>a</sup>                                                                  | 10     | 37      | August 10 <sup>th</sup> , 2020 |
| WHO reference panel                                       | 31                      | Unknown   |         | At least 28 days                                                                 |        |         | June 26 <sup>th</sup> , 2020   |
| Ambulatory and hospitalized population (AHP) <sup>b</sup> | 37                      | 24        | 81      | 38                                                                               | 10     | 119     | July 20 <sup>th</sup> , 2020   |

96 <sup>a</sup> Number of days after ICU admission; <sup>b</sup> 34 ambulatory and 3 hospitalized (but not critically ill) patients.

97 **Immunoassays**

98 Anti-SARS-CoV-2 IgG antibodies were detected with an enzyme-linked immunosorbent assay (ELISA) kit (DBC  
 99 anti-SARS-CoV-2 ELISA, DBC-IGG-19) with interim authorization by Health Canada. In brief, the ELISA based  
 100 assays were designed against antigens formulated by recombinant proteins (aa 319-541) created from the WT  
 101 RBD sequence (original manufacturer's ELISA design) or those representing the RBD of prevalent VOCs (Table  
 102 2) with their various mutation sets (N501Y, K417N-E484K-N501Y, K417T-E484K-N501Y, L452R, L452R-  
 103 E484Q, L452R-T478K, K417NL452R-T478K, N439K, Y453F, S477N, K417T).

104 The original WT assay (CAN-IGG-19) uses a ratio between the optical density (OD) of the sample and the cut-  
 105 off [**Ratio = OD of sample / Cut-Off**] to determine a 'positive' vs 'negative' result, where the Cut-Off [**Cut-Off**  
 106 **(CO) = (Mean of 3 Negative Control results) x factor 1.5**] is used to generate a ratio which is then interpreted  
 107 as a Positive (Ratio ≥ 1.2), Negative (Ratio ≤ 1.0), or Borderline (Ratio 1.0 – 1.2) result.

108 In this study, the ratio was used only to compare the results between cohorts within the same antigen. When  
109 comparisons were made between antigens, we used the optical density (OD) generated by the binding of  
110 samples' antibodies to the antigens (rather than the ratio); in this way isolating the antigen-antibody interaction  
111 and avoiding bias generated by differences in binding between the antigens and the negative control.

112 More details on the layout and performance of the original test can be found in [16] and in the kit's IFU  
113 (<https://dbc-labs.com/products/elisa/anti-sars-cov-2-igg/>).

114 DiaSorin Liaison SARS-CoV-2 S1/S2 IgG results were provided by the sample supplier.

### 115 **Neutralization antibodies study**

116 To establish the validity of the DBC-IGG-19 ELISA kit to detect neutralizing antibodies we ran a comparison  
117 study against Genscript cPass™ SARS-CoV-2 Neutralization Antibody Detection/Surrogate Virus  
118 Neutralization Test Kit (NJ, USA). This assay was previously validated against plaque reduction neutralization  
119 tests PRNT50 and PRNT90 with 100% agreement (See manual for SARS-CoV-2 Surrogate Virus Neutralization  
120 Test Kit).

121 The samples were run with both the Genscript Kit and the DBC ELISAs for each of the WT and variants listed  
122 above following the instructions for use of each test.

### 123 **Variant-specific immunoassays**

124 To test the binding of antibodies to mutated antigens, microplates were coated with recombinant RBD  
125 harbouring mutations present in 11 of the most widespread variants of the virus to date (Table 2). The  
126 expression system used to generate the mutant antigen RBD was identical to that of the previously released  
127 DBC kit (DBC-IGG-19) with the only difference being the mutations themselves. The mutated antigens were  
128 coated under the same conditions used for the WT antigen currently in the commercial anti-SARS-CoV-2 IgG  
129 immunoassay. All other reagents of the variant kits used and serological test conditions remained the same as  
130 the WT unaltered assay (DBC-IGG-19).

131

132

133

134

135 **Table 2.** Classification of the variants and RBD mutations associated with the antigens of this study.

| <b>Variant name</b> | <b>Lineage (PANGO)</b> | <b>Clade (GISAID)</b> | <b>RBD mutations</b>    | <b>Country of first detection</b> |
|---------------------|------------------------|-----------------------|-------------------------|-----------------------------------|
| Wild Type           | B                      | G                     | -                       | China                             |
| Alpha               | B.1.1.7                | GRY                   | N501Y                   | United Kingdom                    |
| Beta                | B.1.351/501Y.V2        | GH                    | K417N, E484K and N501Y  | South Africa                      |
| Gamma               | P.1/B.1.1.28.1.        | GR                    | K417T, E484K, and N501Y | Brazil                            |
| Epsilon             | B.1.427/429            | GH                    | L452R                   | Denmark                           |
| Kappa               | B.1.617.1              | G                     | L452R, E484Q            | India                             |
| Delta               | B.1.617.2              | G                     | L452R, T478K            | India                             |
| Delta Plus          | B.1.617.3              | G                     | K417N, L452R, T478K     | India                             |
| N439K               | B.1.141/B.1.258        | GR                    | N439K                   | United Kingdom                    |
| Y453F               | N/A                    | N/A                   | Y453F                   | Denmark                           |
| S477N               | B.1.526.2/B1.1.25      | 20.C                  | S477N                   | Australia                         |
| K417T               | N/A                    | N/A                   | K417T                   | Brazil                            |

136

### 137 **Statistical Analysis**

138 Statistical analysis was performed using Analyse-it software (Analyse-it Software, Ltd. (UK); [https://analyse-](https://analyse-it.com/)  
139 [it.com/](https://analyse-it.com/)). Univariate group comparisons with non-parametric Steel pairwise ranking were calculated to compare  
140 variants within each cohort (figure 2) and cohorts within each variant (figure 3). P-values at the 5% significance  
141 level were used to establish differences between variables.

142 We compared the results of WT antigen to antigens with RBD mutations within each patient cohort based on  
143 optical density (OD) which represents binding between antibodies in patient samples and the presented antigen  
144 (i.e. the antigen coated onto the microplates), rather than ratios because the ratios are calculated using the  
145 negative control as a reference of the cut-off. Therefore, the ratios are affected by changes in the binding of the  
146 Negative control to the mutated antigens (Figure 2). To compare cohorts within each variant we used the ratio,  
147 because as long as the same antigen is used, normalizing by the negative control enables assessment of the  
148 clinical result (positive, borderline, or negative) (Figure 3).

## 149 **Results**

### 150 **Detection of neutralizing antibodies.**

151 To evaluate the capacity of the RBD variant DBC ELISA kits in this study to detect neutralizing antibodies we  
152 compared patient sample results against the Genscript cPass™ SARS-CoV-2 Neutralization Antibody Kit.

153 All 168 samples that generated a positive neutralizing antibody result with the GenScript test were also  
154 confirmed with the DBC ELISA for 100% positive agreement (See supplemental Table S5, borderline results  
155 are counted as positive). We observed a positive exponential relationship between the inhibition rate produced  
156 by the GenScript kit (x) and the ratio generated by the ELISA (y),  $y = 0.4275e^{0.0385x}$ ,  $r = 0.85$  (Figure 1).

157 Additionally, the GenScript neutralizing antibody kit reported a positive result in 98.2% (165 of 168) of COVID  
158 seroconverters also detected by the DBC ELISA (counting borderline DBS results as negative). The few  
159 seropositive samples that produced a negative neutralizing antibody result had a low serological positive ratio  
160 ( $< 1.9$ ) relatively close to the Cut-off.

### 161 **Reactivity of vaccine and infection sera with WT and mutated antigens**

162 To assess how the humoral immune response in vaccinated individuals compares to antibodies generated from  
163 WT infection, and the further influence of the mutations present in the RBD of SARS-CoV-2 variants, we  
164 purchased commercial samples of sera from individuals who had received two doses of the Moderna mRNA-  
165 1273 or the Pfizer BioNTech COVID-19 vaccines during the first 3 months of 2021.

166 Even though the donors recruited for the study had declared themselves healthy and uninfected with COVID-  
167 19, 25% had a positive pre-vaccine anti-SARS-CoV-2 IgG result with the DBC assay (18% with DiaSorin,  
168 Tables S1 and S2 in Supplemental Material). In 80% of those donors, the ELISA signal was above the maximal  
169 OD of 4 after the first vaccine dose suggesting that the asymptomatic infection might have been equivalent to  
170 a first vaccine dose.

171 For the rest of the vaccinated donors, the ELISA ratio increased more than two times between the first and the  
172 second vaccination doses. After the second vaccination dose, binding responses appear to converge, as we  
173 no longer observed a higher SARS-CoV-2 IgG ELISA ratio among the subjects who had a viral infection before  
174 the vaccination. In fact, only four (including one sample from a donor positive before the vaccination) of 60  
175 samples did not produce a ratio higher than 15 after two vaccination doses (Supplemental Table S1). We,

176 therefore, estimate that a prior infection had a negligible effect in the load of anti-SARS-CoV-2 antibodies after  
177 two vaccine doses

178 Sera from vaccinated individuals were compared to sera of three COVID-19 convalescent cohorts: a) ICU  
179 patients, split into short (2-7 days) and longer (10+ days) hospitalization, b) a reference panel of samples from  
180 SARS-CoV-2 positive donors produced by NIBSC/WHO (WHO), and c) infected ambulatory or hospitalized  
181 population (AHP) samples.

182 For AHP and WHO samples, the ELISA OD response of the serological tests in four of the variants was not  
183 different ( $p>0.05$ ) from WT antigen (Figure 2)—all four variants had a single mutation in the RBD (N501Y,  
184 L452R, K417T, or S477N). This pattern was different for the vaccinated, for whom three of the above single  
185 mutations and two triple mutation antigens displayed no differences in relation to the WT antigen (Figure 2). No  
186 significant differences ( $p>0.05$ ) were observed between the WT and variants in the reactivity of ICU sera (Figure  
187 2). We observed a consistent trend across individual donors (Supplemental Figure S1).

188 Sera from vaccinated individuals consistently exhibited a higher ratio ( $p<0.001$ ) than sera from infected (but not  
189 critically ill) individuals (AHP, WHO) when tested against the WT and each of the 11 variants (Figure 3). Only  
190 the vaccinated cohort displayed a median ratio higher than 15 against all the mutated antigens—except the  
191 N439K antigen, which significantly lowered the median of ratio results in all cohorts. Still, even against this  
192 antigen, none of the samples from vaccinated donors produced a negative ratio result ( $<1.0$ ). (Figure 3).

193 The second highest antibody response was from critically ill ICU patients who were hospitalized for more than  
194 10 days. For seven of twelve of the antigens, including the WT antigen, this cohort was not different from the  
195 vaccinated. ICU patients upon admission (2-7 days), WHO, and AHP samples presented lower positive ratios  
196 (Figure 3).

197 To assess if the differences between the cohorts were due to lower age range of vaccinated and AHP in  
198 comparison to ICU patients (Table 1), we split the ratio results of the vaccinated and AHP cohorts into those  
199 from donors younger and older than 45 (since the ICU 10+ were all older than 45) and compared them. We  
200 found no age-related differences ( $p>>0.05$ ) (Supplemental Figures S2, S3).

## 201 **Discussion**

202 Differences in cross-variant seroreactivity between population cohorts, including vaccinated individuals and  
203 severely ill patients, have been scarcely documented. Current concerns are that some variants might escape



204 neutralizing antibodies (an issue just recently developing with the recent multi-mutation bearing variant  
205 Omicron), but it is unclear how factors such as vaccines and the severity of the disease can influence the  
206 outcome. In this study, we used sera from vaccinated and previously infected individuals to evaluate their ability  
207 to recognize mutations in the SARS-CoV-2 RBD. We show that vaccine sera exhibited higher reactivity than  
208 convalescence sera from non-critically ill individuals against all twelve studied SARS-CoV-2 RBD antigens  
209 tested, including the WT RBD, while the reactivity of critically ill sera bridged those cohorts in most variants.

210 Understanding the nature of viral and vaccine-induced immunity is critical to managing the course of an  
211 epidemic [17]; in particular, how individuals infected early in the pandemic, or those who have been vaccinated  
212 will be protected against emerging variants, more importantly, variants holding mutations in the RBD—a region  
213 targeted by ~90% of the neutralizing antibody activity [2].

214 To establish the capability of the ELISA used in this study to detect neutralizing antibodies we compared its  
215 performance against the Genscript cPass SARS-CoV-2 Neutralization antibody detection kit and found 100%  
216 positive agreement. This performance was likely enabled by the fact that the antigen in the ELISA comprises  
217 the critical RBD region of the virus. Indeed, immunoassays that use the full spike as antigen show a diminished  
218 ability to detect neutralizing antibodies [18].

219 Having established the capacity of the serological test to detect neutralizing antibodies, we proceeded to  
220 evaluate how sera from COVID infected critically ill patients recognize antigens harbouring RBD mutations.  
221 Previously, we have shown that IgG levels increase soon after admission to the ICU [16]. Here, we found that  
222 sera from ICU patients did not significantly distinguish any of the mutated antigens when compared to WT  
223 ( $p>0.05$ , Figure 2). Perhaps, severe, and prolonged infection induces a broad polyclonal antibody variability  
224 enabling reactivity to a wide range of antigenic variants.

225 For other cohorts, including the vaccinated, not all the mutations caused a decrease in the antigen's antibody  
226 recognition (Figure 2). Vaccine sera did not discriminate five of the variants against the WT according to ELISA  
227 OD values, while WHO and AHP samples showed that four of the mutated target antigens, all bearing a single  
228 mutation, enabled the same level of antigen recognition in comparison to the WT. Conversely, mutations N439K  
229 (present in deemed extinct lineages B.1.141 and B.1.258), K417N-E484K-N501Y (Beta variant), and L452R-  
230 T478K (Delta variant) produced lower ODs ( $p<0.05$ ) than the WT across the vaccinated, WHO and AHP panels.  
231 Differences between vaccine sera and WHO or AHP sera might be expected since the antigen configuration  
232 and display generated by the mRNA vaccines is dramatically different from that of the live viruses [3]. For

233 example, K417T-E484K-N501Y (Beta variant) and L452R-E484Q (Delta Plus variant) were distinguished from  
234 the WT by WHO and AHP cohorts but not by the vaccinated.

235 It is noteworthy that the WHO and AHP panels, comprised of samples collected from two separate and unrelated  
236 populations, yielded almost identical results (Figure 2). Both panels identified the antigens with mutations  
237 corresponding to three VOCs (Beta, Gamma, Delta) Delta Plus, a fact that suggests that variant-specific  
238 immunoassay-based screenings on existing sera samples could serve as prospective tests to assess the  
239 potential impact of new variants before sufficient epidemiological data is available.

240 However, we believe that our results do not necessarily extrapolate to patterns in the *in vivo* neutralization of  
241 variants because we are examining antigens constructed solely by the RBD, while the mutations' effect on virus  
242 affinity to the ACE2 receptor is not considered here. Nor are we examining the influence of variants' full set of  
243 concomitant mutations outside of the RBD. Nevertheless, considering that the RBD plays a critical role in the  
244 antigenicity of new variants [2] we hypothesized that a relationship might exist between patient vulnerability to  
245 infection and disease and the reactivity of antibodies to isolated variant RBD. This is important considering that  
246 in a short time most of the worlds' population should have some degree of immunity either by infection or  
247 vaccines' (57% of the world's population received at least one COVID-19 vaccine dose by December 23<sup>rd</sup> 2021,  
248 according to Ourworldindata.org).

249 Our results tend to match previous findings. Compared to the WT, neutralization of B.1.1.7 (Alpha) and P.1  
250 (Gamma) was found to be roughly equivalent [19], while neutralization of B.1.351 (Beta) spike protein was lower  
251 but still relatively robust. Neutralization titers against mutant viruses containing key spike mutations: N501Y and  
252 E484K-N501Y-D614G were found to be 1.46 and 0.81 in relation to the WT virus respectively [4] which matches  
253 well with the results we obtained for WHO and AHP panels for those mutations (Figure 2). Similarly, Wu et al.  
254 [5] detected reductions of the titer of neutralizing antibodies by a factor of 1.2 with pseudo-viruses encoding the  
255 B.1.1.7 (Alpha) variant compared to a factor of 6.4 and 3.5 against the B.1.351 (Beta) and P.1 (Gamma)  
256 variants. Those studies again align with our data showing that antibody binding to antigen with N501Y mutation  
257 alone and WT antigen are the same in all tested cohorts. Conversely, mutants including E484K-N501Y  
258 produced lower binding in WHO and AHP samples. Other reports, however, indicate that both B.1.1.7 (Alpha)  
259 and B.1.351 (Beta) lead to a decrease in neutralization [9,14,20].

260 Epidemiological data is conflicting but tend to assign higher mortality to mutations associated with B.1.351  
261 (Beta) than to B.1.1.7 (Alpha) [21]. However, a recent study found increased transmissibility of variants that  
262 included mutations N501Y and E484K but not increased disease severity [22].

263 Residues N501 and E484 play different functions in the infectivity of the virus. Residue N501 is at the RBD-  
264 ACE2 interface and mutation N501Y was found to result in an increase of affinity to ACE2 [23]. Mutation E484,  
265 in turn, has been identified as an immunodominant spike protein residue with various mutations, including  
266 E484K, supporting escape from several monoclonal antibodies [24]. This divergence of functions between  
267 residues N501 and E484 might explain why we found E484K to reduce binding of WT-induced antibodies  
268 whereas N501Y and WT did not differ.

269 Additionally, in studies with monoclonal antibodies, the spike's B.1.1.7 (Alpha) mutations were shown to reduce  
270 neutralization mostly of antibodies specific to the spike's amino-terminal domain (NTD) but only with a small  
271 proportion of RBD specific antibodies [25].

272 Considering the immunodominance of the RBD, this could explain some of the moderate reduction in  
273 neutralizing activity of convalescence sera against authentic B.1.1.7 (Alpha) or pseudo-viruses carrying the  
274 B.1.1.7 (Alpha) spike mutations [26, 27] and the lack of diminished seroreactivity to N501Y by any of the cohorts  
275 of this study (Figure 2).

276 Furthermore, neutralization by some RBD-specific and NTD-specific monoclonal antibodies was found to be  
277 unaffected by variation in the spike protein suggesting the presence of cross-neutralizing epitopes in both the  
278 RBD and NTD [28].

279 Remarkably, mutation N439K produced one of the most consistent drops in ODs compared to WT and other  
280 variants (Fig 2). Early in 2021, N439K was the second most prevalent mutation of the RBD sequence [29], but  
281 currently is not one of the top ten most distributed mutations worldwide. This mutation is noteworthy because it  
282 enhances the binding affinity for the ACE2 receptor and decreases the neutralizing activity of both monoclonal  
283 antibodies and serum polyclonal antibodies of convalescence patients [10].

284 However, a deep mutational scanning (DMS) study did not find that mutation N439K significantly alters  
285 neutralization by polyclonal antibodies in plasma [30] in contrast to the findings described above [10] and our  
286 results (Figs 2 and 3). According to Harvey et al. [31], this discrepancy derives from the fact that the mechanism  
287 of immune escape provided by N439K is based on increased affinity to ACE2 rather than by directly affecting

288 epitope recognition. Perhaps then, the experimental design of the DMS study is less sensitive to detecting  
289 immune evasion mutations of this type—an inconsistency that exposes limitations of DMS [32] and highlights  
290 the significance of testing the ability of immune (COVID-19 positive) sera to recognize new variants with real  
291 human samples and serological-based assays.

292 Mutation S477N—that has emerged several times during the pandemic [31]—was found in one study to be  
293 resistant to neutralization by a panel of monoclonal antibodies, but by contrast, responds similarly to the WT  
294 when tested with convalescence (polyclonal) serum [33]—a result that aligns with the data of this study (Figure  
295 2), once again underscoring the advantage of testing real patient sera to evaluate the antigenicity of new  
296 mutations.

297 A recent study found lineage B.1.617.2 (Delta) to be associated with an increase in disease severity [34]. This  
298 variant also caused a higher rate of vaccine breakthrough cases (17.4% compared to 5.8% for all other variants)  
299 in Texas, with 8.4% of all COVID-19 cases occurring in fully vaccinated individuals [35]. In our study, the Delta  
300 and kappa variants (which share the L452R mutation) eluded vaccine and infection sera antibodies more than  
301 the WT in all cohorts except for critically ill patients (Figure 2).

302 However, in vaccinated individuals, we observed a shift towards higher ODs when mutation K417N was added  
303 to the Delta variant mutations L452R and T478K to replicate the Delta Plus variant (B.1.617.3, K41N-L452R-  
304 T478K) mutation set. These additional mutations diminished the decreased binding seen in the Delta variant  
305 compared to Wild Type ( $p < 0.001$ ), which ultimately demonstrated a similar binding profile for the Delta Plus  
306 variant vs Wild Type (Figure 2). Not much epidemiology data have been collected so far about the Delta Plus  
307 variant, but it has been pointed out that this variant spreads more easily and is potentially more infectious [36].

308 As the recently emerging Omicron variant begins to spread, it is relevant to this study to note that this VOC  
309 bears 5 of the spike protein mutations examined (N501Y, K417N, E484A, T478K, S477N) [37]. While it is  
310 beyond the scope of this study to evaluate the effects of these mutations individually or collectively in the  
311 immunoreactivity of the Omicron variant, we believe evaluation of this VOC and future inevitable variants using  
312 similar assay panels may give insight into immune escape effects.

313 Our study has some limitations. We have not investigated how antibodies generated by vaccines other than the  
314 mRNA based Moderna and Pfizer products would respond to variant antigens; vaccines with different antigen  
315 presentations might result in a different pattern of variant recognition. The study is also limited by the fact that

316 we were not able to examine how immune sera collected several months or years after infection or vaccination  
317 would affect recognition of RBD in antigens of new variants.

## 318 **Conclusions**

319 In summary, our results indicate that:

320 a) Recognition of SARS-CoV-2 RBD in the sera of vaccinated individuals is significantly enhanced compared  
321 to sera from non-critically infected patients regardless of the antigen variant.

322 b) The antibodies generated in critically ill individuals are less variant-specific than those of non-critically ill and  
323 vaccinated subjects.

324 c) The antibodies present in the sera of non-critically ill convalescent donors distinguish some variants—  
325 noteworthy, Beta, Gamma, Delta, and Delta Plus variants—in relation to the WT, a fact that could enable  
326 variant-specific immunoassay-based screenings to aid evaluating the potential epidemiological impact of  
327 new variants.

328

## 329 **References**

- 330 1. Deng X, Garcia-Knight MA, Khalid MM, Servellita V, Wang C, Morris MK, et al. Transmission, infectivity,  
331 and neutralization of a spike L452R SARS-CoV-2 variant. *Cell*. 2021;184:3426-37 e8.
- 332 2. Piccoli L, Park YJ, Tortorici MA, Czudnochowski N, Walls AC, Beltramello M, et al. Mapping Neutralizing  
333 and Immunodominant Sites on the SARS-CoV-2 Spike Receptor-Binding Domain by Structure-Guided  
334 High-Resolution Serology. *Cell*. 2020;183:1024-42 e21.
- 335 3. Valdes-Balbin Y, Santana-Mederos D, Paquet F, Fernandez S, Climent Y, Chiodo F, et al. Molecular  
336 Aspects Concerning the Use of the SARS-CoV-2 Receptor Binding Domain as a Target for Preventive  
337 Vaccines. *ACS Cent Sci*. 2021;7:757-67.
- 338 4. Xie X, Liu Y, Liu J, Zhang X, Zou J, Fontes-Garfias CR, et al. Neutralization of SARS-CoV-2 spike 69/70  
339 deletion, E484K and N501Y variants by BNT162b2 vaccine-elicited sera. *Nat Med*. 2021;27:620-1.
- 340 5. Wu K, Werner AP, Koch M, Choi A, Narayanan E, Stewart-Jones GBE, et al. Serum Neutralizing Activity  
341 Elicited by mRNA-1273 Vaccine. *N Engl J Med*. 2021;384:1468-70.
- 342 6. Rathnasinghe R, Jangra S, Cupic A, Martínez-Romero C, Mulder L, Kehrer T, et al. The N501Y mutation  
343 in SARS-CoV-2 spike leads to morbidity in obese and aged mice and is neutralized by convalescent and  
344 post-vaccination human sera. *medRxiv : the preprint server for health sciences*, 2021.  
345 <https://doi.org/10.1101/2021.01.19.2124959>
- 346 7. Edara VV, Hudson WH, Xie X, Ahmed R, Suthar MS. Neutralizing Antibodies Against SARS-CoV-2  
347 Variants After Infection and Vaccination. *JAMA*. 2021;325:1896-8.

- 348 8. Chen RE, Zhang X, Case JB, Winkler ES, Liu Y, VanBlargan LA, et al. Resistance of SARS-CoV-2 variants  
349 to neutralization by monoclonal and serum-derived polyclonal antibodies. *Nat Med.* 2021;27:717-26.
- 350 9. Wang P, Nair MS, Liu L, Iketani S, Luo Y, Guo Y, et al. Antibody resistance of SARS-CoV-2 variants  
351 B.1.351 and B.1.1.7. *Nature.* 2021;593:130-5.
- 352 10. Thomson EC, Rosen LE, Shepherd JG, Spreafico R, da Silva Filipe A, Wojcechowskyj JA, et al. Circulating  
353 SARS-CoV-2 spike N439K variants maintain fitness while evading antibody-mediated immunity. *Cell.*  
354 2021;184:1171-87 e20.
- 355 11. Motozono C, Toyoda M, Zahradnik J, Ikeda T, Saito A, Tan TS, et al. An emerging SARS-CoV-2 mutant  
356 evading cellular immunity and increasing viral infectivity. *bioRxiv.* 2021.
- 357 12. McCallum M, Bassi J, Marco A, Chen A, Walls AC, Julio JD, et al. SARS-CoV-2 immune evasion by variant  
358 B.1.427/B.1.429. *bioRxiv.* 2021.
- 359 13. Hayashi T, Yaegashi N, Konishi I. Effect of RBD (Y453F) mutation in spike glycoprotein of SARS-CoV-2  
360 on neutralizing IgG affinity. *medRxiv.* 2021.
- 361 14. Wang Z, Schmidt F, Weisblum Y, Muecksch F, Barnes CO, Finkin S, et al. mRNA vaccine-elicited  
362 antibodies to SARS-CoV-2 and circulating variants. *Nature.* 2021;592:616-22.
- 363 15. Verdecchia P CC, Spanevello A, Angeli F. The pivotal link between ACE2 deficiency and SARS-CoV-2  
364 infection. *Eur J Intern Med.* 2020;76:14-20.
- 365 16. Fraser DD, Cepinskas G, Slessarev M, Martin CM, Daley M, Patel MA, et al. Critically Ill COVID-19 Patients  
366 Exhibit Anti-SARS-CoV-2 Serological Responses. *Pathophysiology.* 2021;28:212-23.
- 367 17. Meschi S, Matusali G, Colavita F, Lapa D, Bordi L, Puro V, et al. Predicting the protective humoral response  
368 to a SARS-CoV-2 mRNA vaccine. *Clin Chem Lab Med.* 2021;59:2010-8.
- 369 18. Legros V, Denolly S, Vogrig M, Boson B, Siret E, Rigaille J, et al. A longitudinal study of SARS-CoV-2-  
370 infected patients reveals a high correlation between neutralizing antibodies and COVID-19 severity. *Cell*  
371 *Mol Immunol.* 2021;18:318-27.
- 372 19. Liu Y, Liu J, Xia H, Zhang X, Fontes-Garfias CR, Swanson KA, et al. Neutralizing Activity of BNT162b2-  
373 Elicited Serum. *N Engl J Med.* 2021;384:1466-8.
- 374 20. Zhou D, Dejnirattisai W, Supasa P, Liu C, Mentzer AJ, Ginn HM, et al. Evidence of escape of SARS-CoV-  
375 2 variant B.1.351 from natural and vaccine-induced sera. *Cell.* 2021;184:2348-61 e6.
- 376 21. Davies NG, Jarvis CI, Group CC-W, Edmunds WJ, Jewell NP, Diaz-Ordaz K, et al. Increased mortality in  
377 community-tested cases of SARS-CoV-2 lineage B.1.1.7. *Nature.* 2021;593:270-4.
- 378 22. Nagano K, Tani-Sassa C, Iwasaki Y, Takatsuki Y, Yuasa S, Takahashi Y, et al. SARS-CoV-2 R.1 lineage  
379 variants that prevailed in Tokyo in March 2021. *J Med Virol.* 2021;93:6833-6.
- 380 23. Starr TN, Greaney AJ, Hilton SK, Ellis D, Crawford KHD, Dingens AS, et al. Deep Mutational Scanning of  
381 SARS-CoV-2 Receptor Binding Domain Reveals Constraints on Folding and ACE2 Binding. *Cell.*  
382 2020;182:1295-310 e20.
- 383 24. Weisblum Y, Schmidt F, Zhang F, DaSilva J, Poston D, Lorenzi JC, et al. Escape from neutralizing  
384 antibodies by SARS-CoV-2 spike protein variants. *Elife.* 2020;9.
- 385 25. Collier DA, De Marco A, Ferreira I, Meng B, Datir R, Walls AC, et al. SARS-CoV-2 B.1.1.7 sensitivity to  
386 mRNA vaccine-elicited, convalescent, and monoclonal antibodies. *medRxiv.* 2021.
- 387 26. Rees-Spear C, Muir L, Griffith SA, Heaney J, Aldon Y, Snitselaar JL, et al. The effect of spike mutations  
388 on SARS-CoV-2 neutralization. *Cell Rep.* 2021;34:108890.

- 389 27. Hu J, Peng P, Wang K, Fang L, Luo FY, Jin AS, et al. Emerging SARS-CoV-2 variants reduce neutralization  
390 sensitivity to convalescent sera and monoclonal antibodies. *Cell Mol Immunol*. 2021;18:1061-3.
- 391 28. Dupont L, Snell LB, Graham C, Seow J, Merrick B, Lechmere T, et al. Neutralizing antibody activity in  
392 convalescent sera from infection in humans with SARS-CoV-2 and variants of concern. *Nat Microbiol*.  
393 2021;6:1433-42.
- 394 29. Li M, Lou F, Fan H. SARS-CoV-2 variants: a new challenge to convalescent serum and mRNA vaccine  
395 neutralization efficiency. *Signal Transduct Target Ther*. 2021;6:151.
- 396 30. Greaney AJ, Loes AN, Crawford KHD, Starr TN, Malone KD, Chu HY, et al. Comprehensive mapping of  
397 mutations in the SARS-CoV-2 receptor-binding domain that affect recognition by polyclonal human plasma  
398 antibodies. *Cell Host Microbe*. 2021;29:463-76 e6.
- 399 31. Harvey WT, Carabelli AM, Jackson B, Gupta RK, Thomson EC, Harrison EM, et al. SARS-CoV-2 variants,  
400 spike mutations and immune escape. *Nat Rev Microbiol*. 2021;19:409-24.
- 401 32. Fowler DM, Fields S. Deep mutational scanning: a new style of protein science. *Nat Methods*. 2014;11:801-  
402 7.
- 403 33. Liu Z, VanBlargan LA, Bloyet LM, Rothlauf PW, Chen RE, Stumpf S, et al. Identification of SARS-CoV-2  
404 spike mutations that attenuate monoclonal and serum antibody neutralization. *Cell Host Microbe*.  
405 2021;29:477-88 e4.
- 406 34. Ong SWX, Chiew CJ, Ang LW, Mak TM, Cui L, Toh M, et al. Clinical and virological features of SARS-  
407 CoV-2 variants of concern: a retrospective cohort study comparing B.1.1.7 (Alpha), B.1.315 (Beta), and  
408 B.1.617.2 (Delta). *Clin Infect Dis*. 2021;23:ciab721.
- 409 35. Musser JM, Christensen PA, Olsen RJ, Long SW, Subedi S, Davis JJ, et al. Delta variants of SARS-CoV-  
410 2 cause significantly increased vaccine breakthrough COVID-19 cases in Houston, Texas. *medRxiv*. 2021.
- 411 36. Roy B, Roy H. The Delta Plus variant of COVID-19: Will it be the worst nightmare in the SARS-CoV-2  
412 pandemic? *Journal of Biomedical Sciences*. 2021;8:1-2.
- 413 37. Cele S, Jackson L, Khan K, et al. SARS-CoV-2 Omicron has extensive but incomplete escape of Pfizer  
414 BNT162b2 elicited neutralization and requires ACE2 for infection. Preprint. *medRxiv*.  
415 2021;2021.12.08.21267417. Published 2021 Dec 11. doi:10.1101/2021.12.08.21267417
- 416
- 417
- 418
- 419
- 420
- 421
- 422
- 423
- 424
- 425
- 426
- 427

428

429

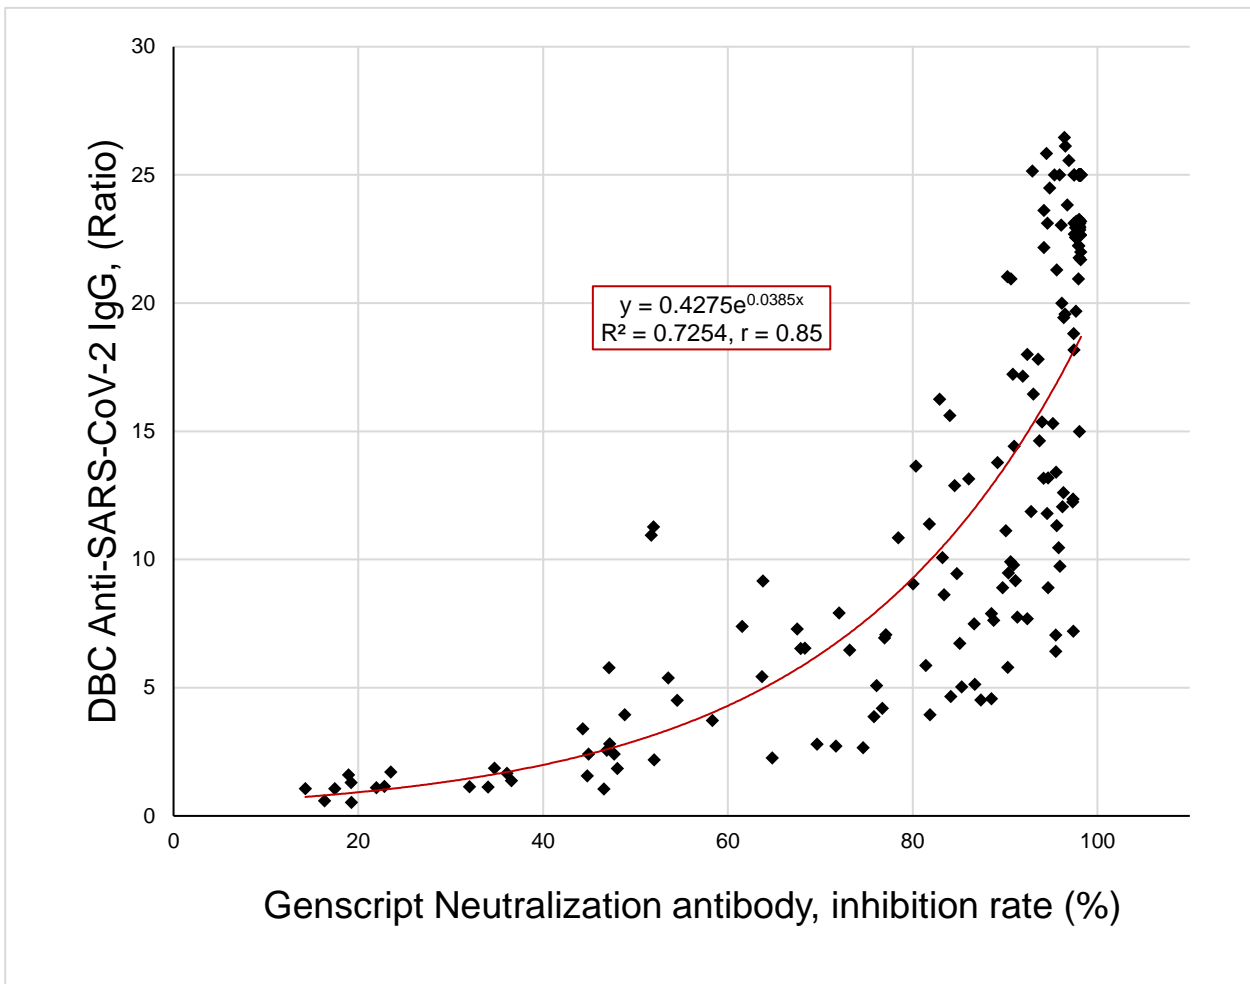

430

431 **Fig 1. Relationship between neutralization and IgG antibody ratio as determined by the Genscript**  
432 **cPass™ SARS-CoV-2 Neutralization Antibody Detection/Surrogate Virus Neutralization Test Kit**  
433 **(L00847) and DBC’s Health Canada authorized anti-SARS-CoV-2 IgG (CAN-IGG-19). Ratio (DBC kit) was**  
434 **calculated based on a Cut Off [Cut-Off (CO) = (Mean of 3 Negative Controls) x factor 1.5] which is then used**  
435 **to generate a ratio [Ratio = OD of sample / Cut-Off].**

436

437



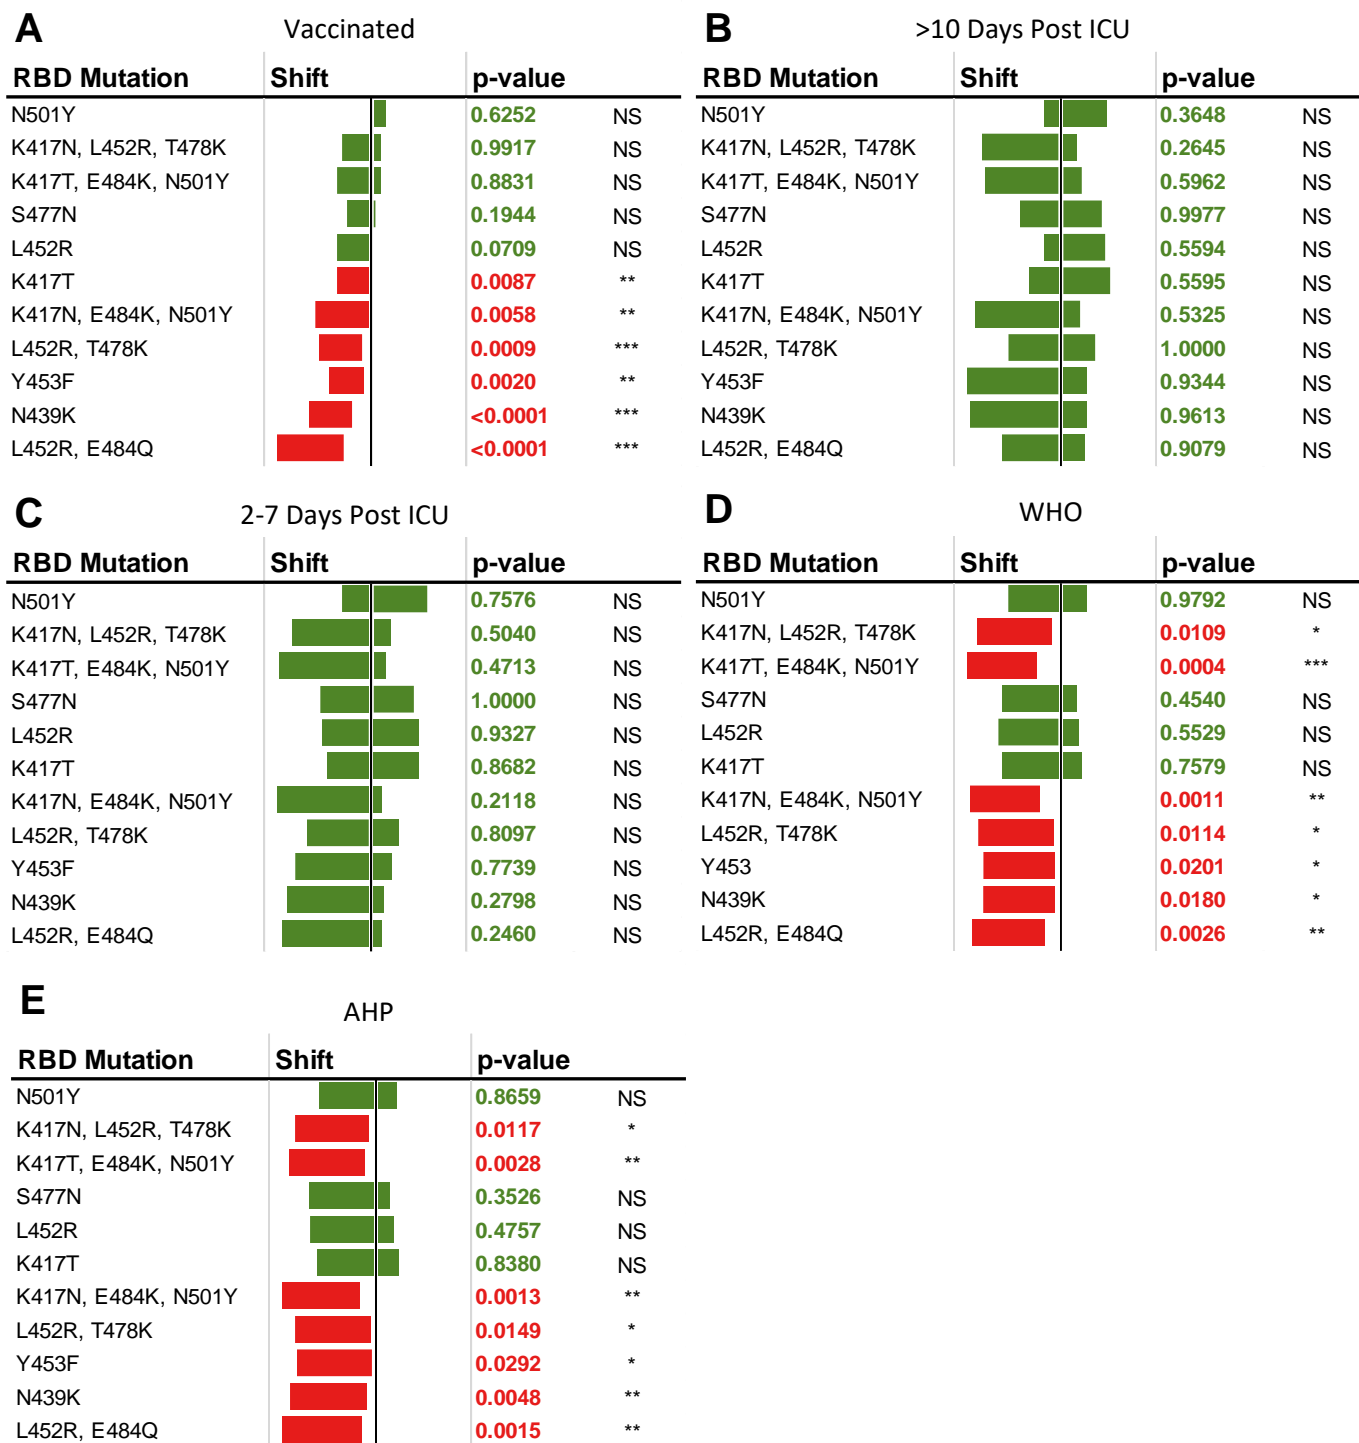

438 **Figure 2. Comparative evaluation of antibody recognition of mutated antigens against WT in five cohorts by**  
 439 **optical density (OD). The OD, rather than the ratio, was used to prevent bias from differences in the ELISAs'**  
 440 **negative control OD between antigens. Univariate Steel pairwise ranking non-parametric comparisons**  
 441 **against the WT antigen.** Experimental datasets for cohorts (A) Vaccinated, (B) >10 days post ICU admission, (C)  
 442 2-7 days post ICU admission, (D) WHO (E) Ambulatory or hospitalized population (AHP), (NS) nonsignificant, (\*)  
 443 P<0.05; (\*\*) P<0.01, (\*\*\*) P<0.001.

444

445

446

447 **Figure 3.**

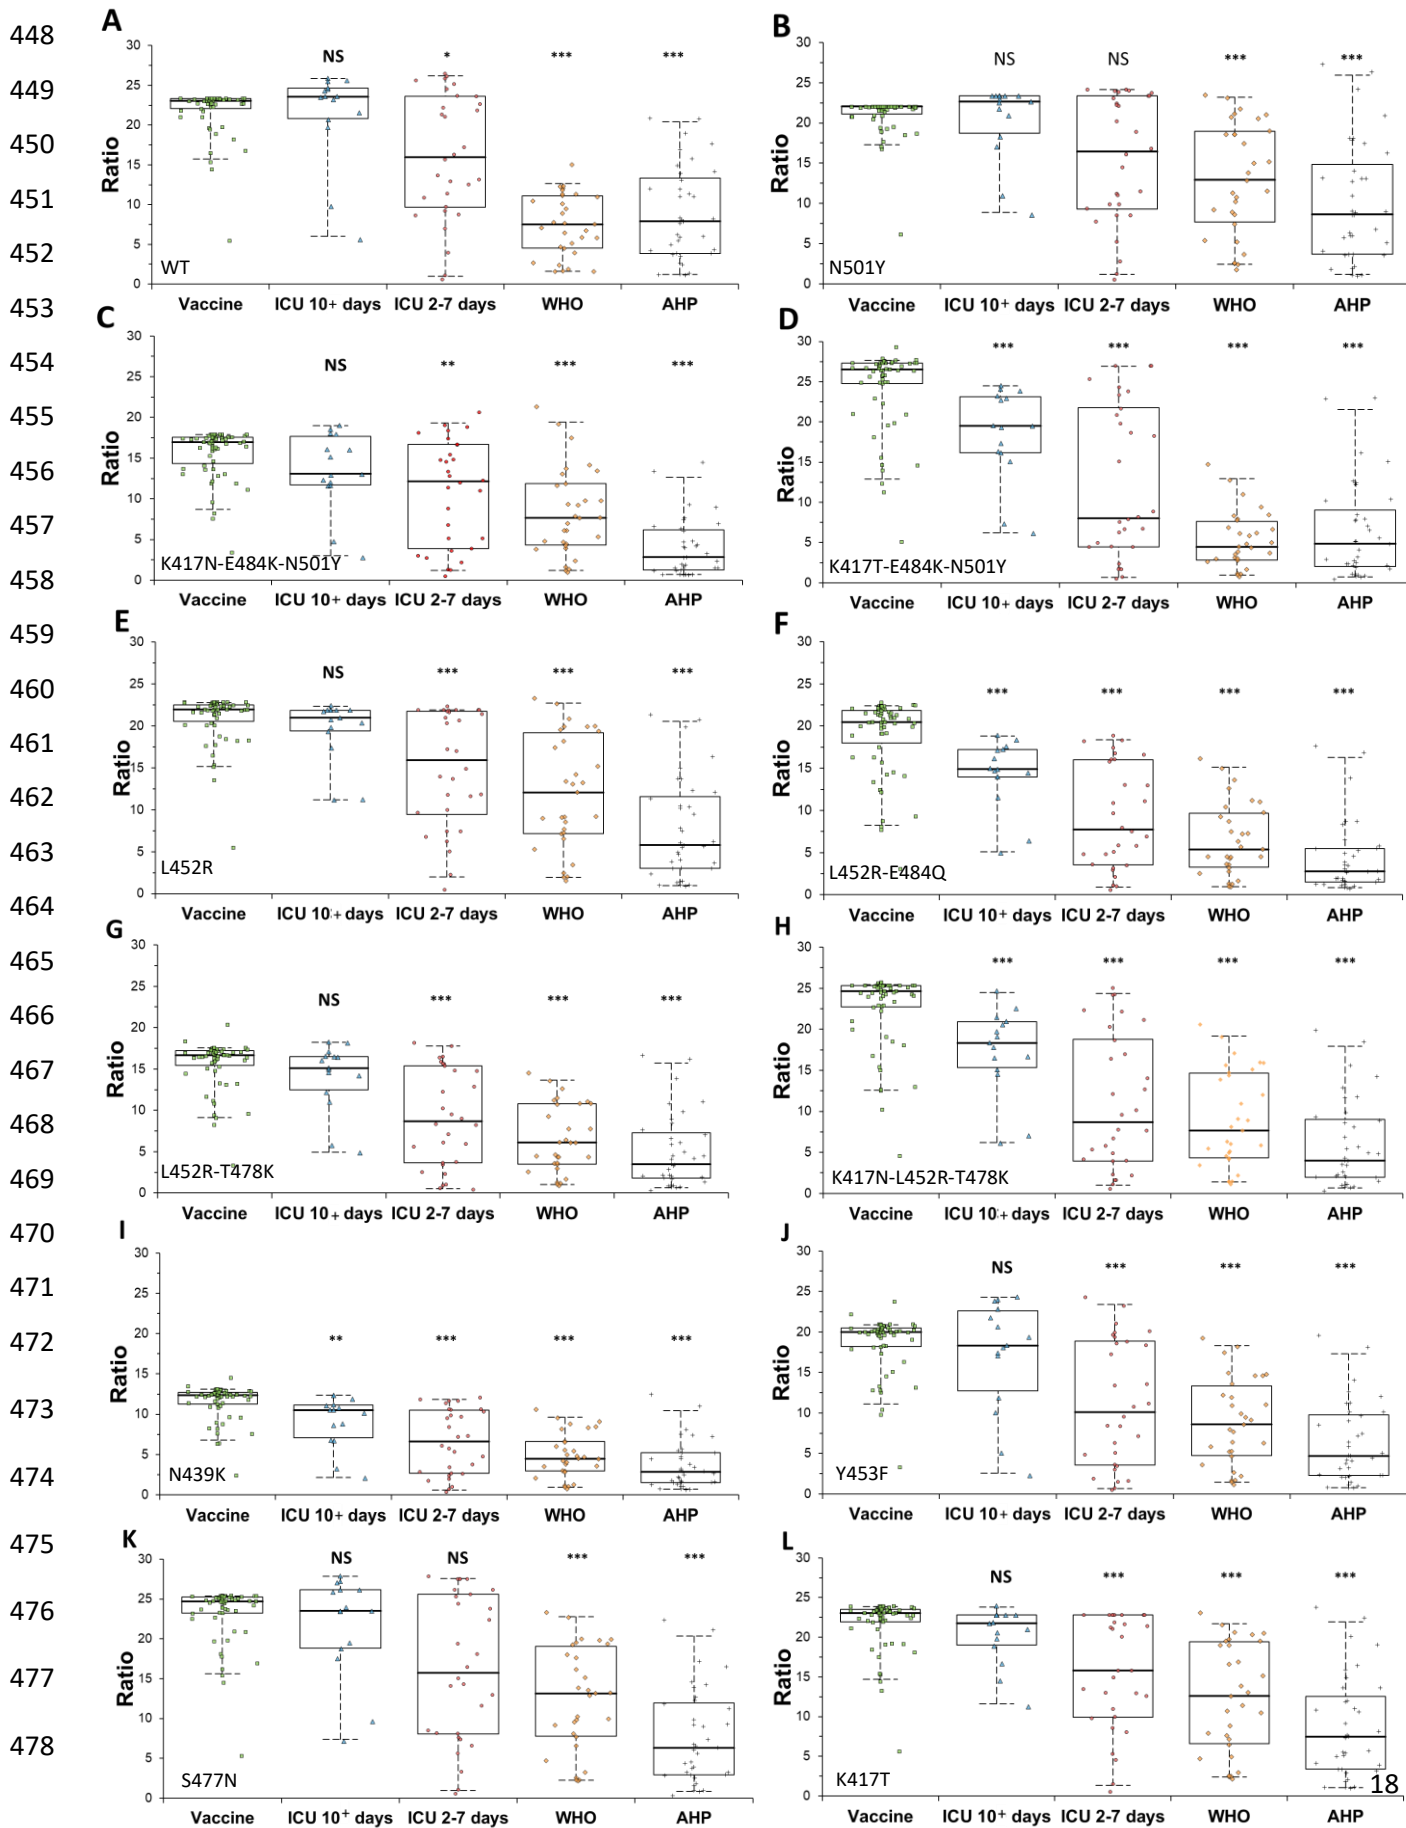

479 **Figure 3. Reactivity of sera from vaccinated individuals (Vaccine), from patients 2-7 (ICU 2-7 days) and**  
480 **more than 10 days (ICU 10+ days) after admission to ICU, from a NIBSC/World Health Organization**  
481 **(WHO) panel, and from ambulatory and hospitalized population (AHP) to recombinant antigens**  
482 **comprising the RBD of wild type (WT) SARS-CoV-2 or recombinant antigens with mutations present in**  
483 **variants of the virus.** Ratio was calculated based on a Cut Off [Cut-Off (CO) = (Mean of 3 Negative  
484 Controls) x factor 2.0] which is then used to generate a ratio [Ratio = OD of sample / Cut-Off]. The cohorts  
485 were compared against the vaccinated using Steel pairwise ranking non-parametric method: (NS)  
486 nonsignificant, (\*) P<0.05; (\*\*) P<0.01, (\*\*\*) P<0.001. The median is plotted as a line. The box represents 1<sup>st</sup>  
487 to 3<sup>rd</sup> quartiles and the whiskers the minimum and maximum of the 95% confidence interval. **(A)** WT, **(B)**  
488 N501Y, **(C)** K417N-E484K-N501Y, **(D)** K417T-E484K-N501Y, **(E)** L452R, **(F)** L452R-E484Q, **(G)** L452R-  
489 T478K, **(H)** K417N-L452R-T478K, **(I)** N439K, **(J)** Y453F, **(K)** S477N, **(L)** K417T.

490

491

492

493

494

495 **SUPPLEMENTAL MATERIAL**

496 **Table S1.** Analysis of samples from the Moderna COVID-19 Vaccine Serum Panel

| Negative               |           | Borderline  | Positive                          |                                   |             |                                                               |                                   |
|------------------------|-----------|-------------|-----------------------------------|-----------------------------------|-------------|---------------------------------------------------------------|-----------------------------------|
| Manufacturer:          |           |             | DiaSorin                          |                                   |             | DBC                                                           |                                   |
| Device:                |           |             | LIAISON SARS-CoV-2 S1/S2 IgG      |                                   |             | Anti-SARS-CoV-2 IgG<br>(CAN-IGG-19)                           |                                   |
| Device Interpretation: |           |             | AU/mL; <15 negative, ≥15 positive |                                   |             | Ratio; ≤1.0 negative, ≥1.2 positive, >1.0 and <1.2 borderline |                                   |
| Count                  | Sample ID | Pre-Vaccine | Post-Vaccine 1 <sup>st</sup> Dose | Post-Vaccine 2 <sup>nd</sup> Dose | Pre-Vaccine | Post-Vaccine 1 <sup>st</sup> Dose                             | Post-Vaccine 2 <sup>nd</sup> Dose |
| 1                      | 101       | <3          | 117                               | 3,380                             | 0.65        | 10.97                                                         | >25                               |
| 2                      | 102       | 60          | 27200                             | 17,920                            | 3.32        | >25                                                           | >25                               |
| 3                      | 103       | 17.5        | 5400                              | 4,280                             | 0.78        | >25                                                           | >25                               |
| 4                      | 104       | 882         | 4080                              | 3,692                             | 16.2        | >25                                                           | >25                               |
| 5                      | 105       | <3.80       | 172                               | 1,150                             | 0.65        | 15.6                                                          | >25                               |
| 6                      | 106       | <3.80       | 189                               | 4,760                             | 0.54        | 17.12                                                         | >25                               |
| 7                      | 107       | <3.80       | 100                               | 880                               | 0.73        | 8.9                                                           | 20.06                             |
| 8                      | 108       | 8.1         | 256                               | 1,580                             | 2.16        | >25                                                           | >25                               |
| 9                      | 109       | <3          | 74                                | 2,340                             | 0.7         | 6.41                                                          | >25                               |
| 10                     | 110       | <3          | 249                               | 4,680                             | 0.56        | 19                                                            | >25                               |
| 11                     | 111       | <3.80       | 78                                | 363                               | 0.6         | 9.97                                                          | 18.9                              |
| 12                     | 112       | <3.80       | 172                               | 4,340                             | 0.65        | 15.06                                                         | >25                               |
| 13                     | 113       | <3          | 229                               | 2,420                             | 0.63        | 15.8                                                          | >25                               |
| 14                     | 115       | 19.7        | 6360                              | 12,160                            | 1.55        | >25                                                           | >25                               |
| 15                     | 117       | <3.80       | 303                               | 3,400                             | 1.01        | 17.03                                                         | >25                               |
| 16                     | 118       | <3.80       | 30                                | 1,020                             | 0.63        | 2.13                                                          | 17.81                             |
| 17                     | 119       | 39.6        | 2420                              | 5,600                             | 4.07        | >25                                                           | >25                               |
| 18                     | 120       | <3          | 65                                | 1,080                             | 0.72        | 5.65                                                          | >25                               |
| 19                     | 121       | <3          | 111                               | 2,920                             | 0.57        | 10.06                                                         | >25                               |
| 20                     | 122       | <3          | 117                               | 3,660                             | 0.58        | 10.86                                                         | >25                               |
| 21                     | 123       | <3          | 49                                | 2,200                             | 0.54        | 3.63                                                          | >25                               |
| 22                     | 124       | 14.1        | 115                               | 1,884                             | 0.74        | 12.61                                                         | >25                               |
| 23                     | 126       | <3.80       | 128                               | 1,360                             | 0.7         | 12.3                                                          | >25                               |
| 24                     | 127       | <3          | 103                               | 1,360                             | 0.59        | 6.77                                                          | 20.5                              |
| 25                     | 128       | <3          | 128                               | 2,120                             | 0.55        | 8.64                                                          | >25                               |
| 26                     | 129       | <3          | 169                               | 1,640                             | 0.54        | 15.72                                                         | >25                               |
| 27                     | 130       | <3.80       | 127                               | 2,600                             | 0.92        | 14.08                                                         | >25                               |
| 28                     | 132       | <3.80       | 173                               | 4,160                             | 0.87        | 16.49                                                         | >25                               |
| 29                     | 133       | <3          | 193                               | 2,320                             | 0.61        | 16.68                                                         | >25                               |

|    |     |       |        |           |       |       |       |
|----|-----|-------|--------|-----------|-------|-------|-------|
| 30 | 134 | <3    | 9      | 2,460     | 0.66  | 0.93  | >25   |
| 31 | 135 | <3    | 11     | 1,970     | 0.7   | 1.81  | >25   |
| 32 | 136 | <3    | 91     | 2,180     | 0.59  | 6.1   | >25   |
| 33 | 137 | <3    | 238    | 4,720     | 0.62  | 17.96 | >25   |
| 34 | 138 | <3    | 6      | 143       | 0.7   | 0.94  | 15.4  |
| 35 | 141 | <3    | 79     | 1,440     | 0.75  | 7.22  | >25   |
| 36 | 144 | 368   | 16800  | 17,920    | 20.64 | >25   | >25   |
| 37 | 145 | 86.4  | 14000  | 9,600     | 4.82  | >25   | >25   |
| 38 | 146 | <3    | 40     | 253       | 0.55  | 2.5   | 16.7  |
| 39 | 150 | 58.2  | 3180   | 4,400     | 6.92  | >25   | >25   |
| 40 | 155 | <3.80 | 10     | 208       | 0.64  | 1.65  | 15.92 |
| 41 | 156 | <3    | <3.00  | 176       | 0.62  | 0.65  | 14.9  |
| 42 | 157 | <3    | 28     | 388       | 0.67  | 2.35  | >25   |
| 43 | 158 | <3.80 | <3.80  | 145       | 2.98  | 3.16  | 14    |
| 44 | 159 | <3    | <3.00  | 180       | 0.74  | 1.07  | 13.5  |
| 45 | 160 | <3    | 116972 | 1,321,064 | 0.48  | 4.21  | >25   |

497  
498  
499  
500  
501  
502  
503  
504  
505  
506  
507  
508  
509  
510  
511  
512  
513  
514  
515  
516  
517

518 **Table S2.** Analysis of samples from the Pfizer COVID-19 Vaccine Serum Panel.

| Negative               |           | Borderline                        |                       |                       | Positive                                                      |                       |                       |
|------------------------|-----------|-----------------------------------|-----------------------|-----------------------|---------------------------------------------------------------|-----------------------|-----------------------|
| Manufacturer:          |           | DiaSorin                          |                       |                       | DBC                                                           |                       |                       |
| Device:                |           | LIAISON SARS-CoV-2 S1/S2 IgG      |                       |                       | Anti-SARS-CoV-2 IgG (CAN-IGG-19)                              |                       |                       |
| Device Interpretation: |           | AU/mL; <15 negative, ≥15 positive |                       |                       | Ratio; ≤1.0 negative, ≥1.2 positive, >1.0 and <1.2 borderline |                       |                       |
| Count                  | Sample ID | Pre-Vaccine                       | Post-Vaccine 1st Dose | Post-Vaccine 2nd Dose | Pre-Vaccine                                                   | Post-Vaccine 1st Dose | Post-Vaccine 2nd Dose |
| 1                      | 114       | 117                               | 5,200                 | 4,880                 | 6.85                                                          | >25                   | >25                   |
| 2                      | 116       | 11.1                              | 127                   | 1,120                 | 2.48                                                          | 15.47                 | 18.2                  |
| 3                      | 125       | 131                               | 1,430                 | 1,090                 | 16.87                                                         | >25                   | 18.1                  |
| 4                      | 131       | <3.80                             | 81                    | 1,350                 | 0.76                                                          | 7.84                  | >25                   |
| 5                      | 139       | <3.80                             | 23                    | 169                   | 1.39                                                          | 3.53                  | 14.02                 |
| 6                      | 140       | <3.80                             | 98                    | 50                    | 0.74                                                          | 9.89                  | 4.82                  |
| 7                      | 142       | <3.80                             | 7                     | 2,920                 | 0.72                                                          | 1.51                  | >25                   |
| 8                      | 143       | <3.80                             | 36                    | 2,150                 | 0.62                                                          | 2.63                  | >25                   |
| 9                      | 147       | <3.80                             | 25                    | 226                   | 0.5                                                           | 1.95                  | 16.7                  |
| 10                     | 148       | <3.80                             | 102                   | 4,080                 | 0.58                                                          | 9.16                  | >25                   |
| 11                     | 149       | <3.80                             | 25                    | 2,070                 | 0.84                                                          | 1.91                  | >25                   |
| 12                     | 151       | <3.80                             | 34                    | 1,640                 | 0.7                                                           | 3.58                  | >25                   |
| 13                     | 152       | 12.8                              | 3,468                 | 4,280                 | 1.61                                                          | >25                   | >25                   |
| 14                     | 153       | <3.80                             | 33                    | 261                   | 0.53                                                          | 4.21                  | 18.54                 |
| 15                     | 154       | 100                               | 7,760                 | 8,240                 | 6.63                                                          | >25                   | >25                   |

519

520

521

522 **Table S3.** Age and sex of sample donor in the 4 Cohorts

| <b>Vaccinated</b> |            |            |
|-------------------|------------|------------|
| <b>Sample #</b>   | <b>Age</b> | <b>Sex</b> |
| 101               | <20        | M          |
| 102               | 21-30      | F          |
| 103               | 21-30      | F          |
| 104               | 21-30      | F          |
| 105               | 21-30      | M          |
| 106               | 21-30      | M          |
| 107               | 31-40      | F          |
| 108               | 31-40      | F          |
| 109               | 31-40      | F          |
| 110               | 31-40      | F          |
| 111               | 31-40      | F          |
| 112               | 31-40      | F          |
| 113               | 31-40      | F          |
| 114               | 31-40      | F          |
| 115               | 31-40      | M          |
| 116               | 31-40      | M          |
| 117               | 41-50      | F          |
| 118               | 41-50      | F          |
| 119               | 41-50      | F          |
| 120               | 41-50      | F          |
| 121               | 41-50      | F          |
| 122               | 41-50      | F          |
| 123               | 41-50      | F          |
| 124               | 41-50      | F          |
| 125               | 41-50      | F          |
| 126               | 41-50      | M          |
| 127               | 41-50      | M          |
| 128               | 41-50      | M          |
| 129               | 41-50      | M          |
| 130               | 41-50      | M          |
| 131               | 41-50      | M          |
| 132               | 51-60      | F          |
| 133               | 51-60      | F          |
| 134               | 51-60      | F          |
| 135               | 51-60      | F          |
| 136               | 51-60      | F          |
| 137               | 51-60      | F          |
| 138               | 51-60      | F          |

|                |             |           |
|----------------|-------------|-----------|
| 139            | 51-60       | F         |
| 140            | 51-60       | F         |
| 141            | 51-60       | M         |
| 142            | 51-60       | M         |
| 143            | 51-60       | M         |
| 144            | 61-70       | F         |
| 145            | 61-70       | F         |
| 146            | 61-70       | F         |
| 147            | 61-70       | F         |
| 148            | 61-70       | F         |
| 149            | 61-70       | F         |
| 150            | 61-70       | M         |
| 151            | 61-70       | M         |
| 152            | 61-70       | M         |
| 153            | 61-70       | M         |
| 154            | 61-70       | M         |
| 155            | 71-80       | F         |
| 156            | 71-80       | F         |
| 157            | 71-80       | F         |
| 158            | 71-80       | M         |
| 159            | 71-80       | M         |
| 160            | 71-80       | M         |
| <b>AVE</b>     | <b>50.1</b> |           |
| <b>Median</b>  | <b>49.5</b> |           |
| <b>SD</b>      | <b>14.8</b> |           |
| <b>Females</b> |             | <b>38</b> |
| <b>Males</b>   |             | <b>22</b> |

523

| <b>AHP</b>      |            |            |
|-----------------|------------|------------|
| <b>Sample #</b> | <b>Age</b> | <b>Sex</b> |
| 161             | 21-30      | F          |
| 162             | 21-30      | F          |
| 163             | 21-30      | F          |
| 164             | 21-30      | F          |
| 165             | 21-30      | M          |
| 166             | 31-40      | F          |
| 167             | 31-40      | F          |
| 168             | 31-40      | F          |
| 169             | 31-40      | F          |
| 170             | 31-40      | F          |
| 171             | 31-40      | F          |



|                |             |           |
|----------------|-------------|-----------|
| 172            | 31-40       | M         |
| 173            | 31-40       | M         |
| 174            | 41-50       | F         |
| 175            | 41-50       | F         |
| 176            | 41-50       | F         |
| 177            | 41-50       | F         |
| 178            | 41-50       | F         |
| 179            | 41-50       | F         |
| 180            | 41-50       | M         |
| 181            | 41-50       | M         |
| 182            | 51-60       | F         |
| 183            | 51-60       | F         |
| 184            | 51-60       | F         |
| 185            | 51-60       | F         |
| 186            | 51-60       | F         |
| 187            | 51-60       | F         |
| 188            | 51-60       | F         |
| 189            | 51-60       | F         |
| 190            | 51-60       | M         |
| 191            | 51-60       | M         |
| 192            | 51-60       | M         |
| 193            | 51-60       | M         |
| 194            | 61-70       | F         |
| 195            | 61-70       | F         |
| 196            | 71-80       | F         |
| 197            | 81-90       | F         |
| <b>AVE</b>     | <b>46.9</b> |           |
| <b>Median</b>  | <b>47</b>   |           |
| <b>SD</b>      | <b>13.5</b> |           |
| <b>Females</b> |             | <b>28</b> |
| <b>Males</b>   |             | <b>9</b>  |

524

| <b>ICU 2 – 7 days</b> |            |            |                |
|-----------------------|------------|------------|----------------|
| <b>Sample #</b>       | <b>Age</b> | <b>Sex</b> | <b>Outcome</b> |
| 198                   | 31-40      | M          | ALIVE          |
| 199                   | 41-50      | F          | ALIVE          |
| 200                   | 41-50      | M          | ALIVE          |
| 201                   | 41-50      | M          | ALIVE          |
| 202                   | 41-50      | M          | DEAD           |
| 203                   | 41-50      | M          | ALIVE          |
| 204                   | 51-60      | F          | ALIVE          |

|                |             |           |       |
|----------------|-------------|-----------|-------|
| 205            | 51-60       | F         | ALIVE |
| 206            | 51-60       | F         | ALIVE |
| 207            | 51-60       | F         | ALIVE |
| 208            | 51-60       | M         | ALIVE |
| 209            | 51-60       | M         | ALIVE |
| 210            | 51-60       | M         | ALIVE |
| 211            | 51-60       | M         | ALIVE |
| 212            | 51-60       | M         | ALIVE |
| 213            | 61-70       | F         | ALIVE |
| 214            | 61-70       | F         | ALIVE |
| 215            | 61-70       | F         | ALIVE |
| 216            | 61-70       | F         | ALIVE |
| 217            | 61-70       | F         | ALIVE |
| 218            | 61-70       | M         | ALIVE |
| 219            | 61-70       | M         | ALIVE |
| 220            | 61-70       | M         | ALIVE |
| 221            | 61-70       | M         | ALIVE |
| 222            | 71-80       | F         | ALIVE |
| 223            | 71-80       | M         | DEAD  |
| 224            | 71-80       | M         | ALIVE |
| 225            | 71-80       | M         | ALIVE |
| 226            | 81-90       | F         | DEAD  |
| <b>AVE</b>     | <b>60.7</b> |           |       |
| <b>Median</b>  | <b>61</b>   |           |       |
| <b>SD</b>      | <b>11.3</b> |           |       |
| <b>Females</b> |             | <b>12</b> |       |
| <b>Males</b>   |             | <b>17</b> |       |

525

| <b>ICU 10+ days</b> |            |            |                |
|---------------------|------------|------------|----------------|
| <b>Sample #</b>     | <b>Age</b> | <b>Sex</b> | <b>Outcome</b> |
| 227                 | 41-50      | F          | ALIVE          |
| 228                 | 41-50      | M          | ALIVE          |
| 229                 | 41-50      | M          | ALIVE          |
| 230                 | 51-60      | F          | ALIVE          |
| 231                 | 51-60      | F          | ALIVE          |
| 232                 | 51-60      | F          | ALIVE          |
| 233                 | 51-60      | F          | ALIVE          |
| 234                 | 51-60      | M          | ALIVE          |
| 235                 | 61-70      | F          | ALIVE          |
| 236                 | 61-70      | F          | ALIVE          |
| 237                 | 61-70      | F          | ALIVE          |

|                |             |          |       |
|----------------|-------------|----------|-------|
| 238            | 61-70       | M        | ALIVE |
| 239            | 61-70       | M        | ALIVE |
| 240            | 71-80       | F        | ALIVE |
| <b>AVE</b>     | <b>58.3</b> |          |       |
| <b>Median</b>  | <b>56</b>   |          |       |
| <b>SD</b>      | <b>8.5</b>  |          |       |
| <b>Females</b> |             | <b>9</b> |       |
| <b>Males</b>   |             | <b>6</b> |       |

526

527

528 **Table S4.** Links to sample NIBSC/WHO information.

| <b>Study Assigned</b> | <b>NIBSC/WHO</b> | <b>Website link</b>                                                                                                   | 529 |
|-----------------------|------------------|-----------------------------------------------------------------------------------------------------------------------|-----|
| <b>Sample ID</b>      | <b>Sample ID</b> |                                                                                                                       | 530 |
| 335                   | 20/B770-1        | <a href="https://www.nibsc.org/documents/ifu/20-B770.pdf">https://www.nibsc.org/documents/ifu/20-B770.pdf</a>         |     |
| 336                   | 20/B770-2        | <a href="https://www.nibsc.org/documents/ifu/20-B770.pdf">https://www.nibsc.org/documents/ifu/20-B770.pdf</a>         |     |
| 337                   | 20/B770-3        | <a href="https://www.nibsc.org/documents/ifu/20-B770.pdf">https://www.nibsc.org/documents/ifu/20-B770.pdf</a>         |     |
| 338                   | 20/B770-4        | <a href="https://www.nibsc.org/documents/ifu/20-B770.pdf">https://www.nibsc.org/documents/ifu/20-B770.pdf</a>         |     |
| 339                   | 20/B770-5        | <a href="https://www.nibsc.org/documents/ifu/20-B770.pdf">https://www.nibsc.org/documents/ifu/20-B770.pdf</a>         |     |
| 340                   | 20/B770-6        | <a href="https://www.nibsc.org/documents/ifu/20-B770.pdf">https://www.nibsc.org/documents/ifu/20-B770.pdf</a>         |     |
| 341                   | 20/B770-7        | <a href="https://www.nibsc.org/documents/ifu/20-B770.pdf">https://www.nibsc.org/documents/ifu/20-B770.pdf</a>         |     |
| 342                   | 20/B770-8        | <a href="https://www.nibsc.org/documents/ifu/20-B770.pdf">https://www.nibsc.org/documents/ifu/20-B770.pdf</a>         |     |
| 343                   | 20/B770-9        | <a href="https://www.nibsc.org/documents/ifu/20-B770.pdf">https://www.nibsc.org/documents/ifu/20-B770.pdf</a>         |     |
| 344                   | 20/B770-10       | <a href="https://www.nibsc.org/documents/ifu/20-B770.pdf">https://www.nibsc.org/documents/ifu/20-B770.pdf</a>         |     |
| 345                   | 20/B770-11       | <a href="https://www.nibsc.org/documents/ifu/20-B770.pdf">https://www.nibsc.org/documents/ifu/20-B770.pdf</a>         |     |
| 346                   | 20/B770-12       | <a href="https://www.nibsc.org/documents/ifu/20-B770.pdf">https://www.nibsc.org/documents/ifu/20-B770.pdf</a>         |     |
| 347                   | 20/B770-13       | <a href="https://www.nibsc.org/documents/ifu/20-B770.pdf">https://www.nibsc.org/documents/ifu/20-B770.pdf</a>         |     |
| 348                   | 20/B770-14       | <a href="https://www.nibsc.org/documents/ifu/20-B770.pdf">https://www.nibsc.org/documents/ifu/20-B770.pdf</a>         |     |
| 349                   | 20/B770-15       | <a href="https://www.nibsc.org/documents/ifu/20-B770.pdf">https://www.nibsc.org/documents/ifu/20-B770.pdf</a>         |     |
| 350                   | 20/B770-16       | <a href="https://www.nibsc.org/documents/ifu/20-B770.pdf">https://www.nibsc.org/documents/ifu/20-B770.pdf</a>         |     |
| 351                   | 20/B770-17       | <a href="https://www.nibsc.org/documents/ifu/20-B770.pdf">https://www.nibsc.org/documents/ifu/20-B770.pdf</a>         |     |
| 352                   | 20/B770-18       | <a href="https://www.nibsc.org/documents/ifu/20-B770.pdf">https://www.nibsc.org/documents/ifu/20-B770.pdf</a>         |     |
| 353                   | 20/B770-19       | <a href="https://www.nibsc.org/documents/ifu/20-B770.pdf">https://www.nibsc.org/documents/ifu/20-B770.pdf</a>         |     |
| 354                   | 20/B770-20       | <a href="https://www.nibsc.org/documents/ifu/20-B770.pdf">https://www.nibsc.org/documents/ifu/20-B770.pdf</a>         |     |
| 355                   | 20/B770-21       | <a href="https://www.nibsc.org/documents/ifu/20-B770.pdf">https://www.nibsc.org/documents/ifu/20-B770.pdf</a>         |     |
| 356                   | 20/B770-22       | <a href="https://www.nibsc.org/documents/ifu/20-B770.pdf">https://www.nibsc.org/documents/ifu/20-B770.pdf</a>         |     |
| 357                   | 20/B770-23       | <a href="https://www.nibsc.org/documents/ifu/20-B770.pdf">https://www.nibsc.org/documents/ifu/20-B770.pdf</a>         |     |
| 327                   | 20/130           | <a href="https://www.nibsc.org/documents/ifu/20-130.pdf">https://www.nibsc.org/documents/ifu/20-130.pdf</a>           |     |
| 328                   | 20/162           | <a href="https://www.nibsc.org/documents/ifu/20-162.pdf">https://www.nibsc.org/documents/ifu/20-162.pdf</a>           |     |
| 329                   | 20/B764-01       | <a href="https://www.nibsc.org/documents/ifu/20-B764-xxx.pdf">https://www.nibsc.org/documents/ifu/20-B764-xxx.pdf</a> |     |
| 330                   | 20/136           | <a href="https://www.nibsc.org/documents/ifu/20-136.pdf">https://www.nibsc.org/documents/ifu/20-136.pdf</a>           |     |
| 331                   | 20/140           | <a href="https://www.nibsc.org/documents/ifu/20-268.pdf">https://www.nibsc.org/documents/ifu/20-268.pdf</a>           |     |
| 332                   | 20/144           | <a href="https://www.nibsc.org/documents/ifu/20-268.pdf">https://www.nibsc.org/documents/ifu/20-268.pdf</a>           |     |
| 333                   | 20/148           | <a href="https://www.nibsc.org/documents/ifu/20-268.pdf">https://www.nibsc.org/documents/ifu/20-268.pdf</a>           |     |
| 334                   | 20/150           | <a href="https://www.nibsc.org/documents/ifu/20-268.pdf">https://www.nibsc.org/documents/ifu/20-268.pdf</a>           |     |

531 **Table S5. Evaluation of Neutralizing Antibodies Detection by Anti-SARS-CoV-2 DBC Serological tests.**  
 532 **Results of testing samples from 4 sources on GenScript cPass™ SARS-CoV-2 Neutralization Antibody**  
 533 **Detection/Surrogate Virus Neutralization Test Kit and DBC IgG anti-SARS-CoV-2 authorized serological**  
 534 **test.** Samples were sourced from (1) infected individuals PCR proven to be SARS-CoV-2 positive, (2) COVID-  
 535 19 infected ICU patients, (3) fully vaccinated individuals (two doses of either Pfizer or Moderna vaccines), and  
 536 (4) Reference samples from NIBSC/WHO. For the GenScript kit, a Positive outcome was considered at ≥30%.  
 537 For the DBC kits, a Positive outcome was considered at a ratio of >1.2, Borderline 1.2-1.0, and Negative <1.0.

| Sample ID | Sample Origin | GenScript                      |           | DBC                          |           |
|-----------|---------------|--------------------------------|-----------|------------------------------|-----------|
|           |               | Neutralizing Antibodies        |           | IgG ELISA                    |           |
|           |               | <30% Negative<br>≥30% Positive |           | <1 Negative<br>>1.2 Positive |           |
|           |               | %NeutAbs                       | Diagnosis | Ratio                        | Diagnosis |
| 161       | 1             | 95.9                           | POSITIVE  | 9.7                          | POSITIVE  |
| 162       | 1             | 17.5                           | NEGATIVE  | 1.1                          | BORD      |
| 163       | 1             | 47.7                           | POSITIVE  | 2.4                          | POSITIVE  |
| 164       | 1             | 44.3                           | POSITIVE  | 3.4                          | POSITIVE  |
| 165       | 1             | 76.1                           | POSITIVE  | 5.1                          | POSITIVE  |
| 166       | 1             | 34.1                           | POSITIVE  | 1.1                          | BORD      |
| 167       | 1             | 84.8                           | POSITIVE  | 9.5                          | POSITIVE  |
| 168       | 1             | 22.8                           | NEGATIVE  | 1.2                          | BORD      |
| 169       | 1             | 96.3                           | POSITIVE  | 12.6                         | POSITIVE  |
| 170       | 1             | 85.3                           | POSITIVE  | 5.0                          | POSITIVE  |
| 171       | 1             | 23.5                           | NEGATIVE  | 1.7                          | POSITIVE  |
| 172       | 1             | 89.8                           | POSITIVE  | 8.9                          | POSITIVE  |
| 173       | 1             | 47.2                           | POSITIVE  | 2.8                          | POSITIVE  |
| 174       | 1             | 80.1                           | POSITIVE  | 9.1                          | POSITIVE  |
| 175       | 1             | 14.3                           | NEGATIVE  | 1.1                          | BORD      |
| 176       | 1             | 75.8                           | POSITIVE  | 3.9                          | POSITIVE  |
| 177       | 1             | 97.4                           | POSITIVE  | 7.2                          | POSITIVE  |
| 178       | 1             | 63.7                           | POSITIVE  | 5.4                          | POSITIVE  |
| 179       | 1             | 64.8                           | POSITIVE  | 2.3                          | POSITIVE  |
| 180       | 1             | 94.2                           | POSITIVE  | 13.2                         | POSITIVE  |
| 181       | 1             | 48.1                           | POSITIVE  | 1.9                          | POSITIVE  |
| 182       | 1             | 92.4                           | POSITIVE  | 18.0                         | POSITIVE  |
| 183       | 1             | 95.6                           | POSITIVE  | 13.4                         | POSITIVE  |
| 184       | 1             | 90.6                           | POSITIVE  | 9.9                          | POSITIVE  |
| 185       | 1             | 92.4                           | POSITIVE  | 7.7                          | POSITIVE  |
| 186       | 1             | 69.7                           | POSITIVE  | 2.8                          | POSITIVE  |
| 187       | 1             | 88.5                           | POSITIVE  | 4.6                          | POSITIVE  |

|     |   |      |          |      |          |
|-----|---|------|----------|------|----------|
| 188 | 1 | 61.6 | POSITIVE | 7.4  | POSITIVE |
| 189 | 1 | 46.9 | POSITIVE | 2.6  | POSITIVE |
| 190 | 1 | 77.1 | POSITIVE | 7.1  | POSITIVE |
| 191 | 1 | 88.5 | POSITIVE | 7.9  | POSITIVE |
| 192 | 1 | 92.8 | POSITIVE | 11.9 | POSITIVE |
| 193 | 1 | 91.0 | POSITIVE | 14.4 | POSITIVE |
| 194 | 1 | 94.7 | POSITIVE | 13.2 | POSITIVE |
| 195 | 1 | 52.0 | POSITIVE | 2.2  | POSITIVE |
| 196 | 1 | 76.7 | POSITIVE | 4.2  | POSITIVE |
| 197 | 1 | 94.0 | POSITIVE | 15.4 | POSITIVE |
| 241 | 1 | 58.3 | POSITIVE | 3.7  | POSITIVE |
| 242 | 1 | 96.1 | POSITIVE | 20.0 | POSITIVE |
| 243 | 1 | 63.8 | POSITIVE | 9.2  | POSITIVE |
| 244 | 1 | 93.7 | POSITIVE | 14.6 | POSITIVE |
| 245 | 1 | 47.1 | POSITIVE | 5.8  | POSITIVE |
| 246 | 1 | 68.4 | POSITIVE | 6.6  | POSITIVE |
| 247 | 1 | 73.2 | POSITIVE | 6.5  | POSITIVE |
| 248 | 1 | 72.1 | POSITIVE | 7.9  | POSITIVE |
| 249 | 1 | 67.5 | POSITIVE | 7.3  | POSITIVE |
| 250 | 1 | 67.9 | POSITIVE | 6.5  | POSITIVE |
| 251 | 1 | 90.9 | POSITIVE | 17.2 | POSITIVE |
| 252 | 1 | 32.1 | POSITIVE | 1.1  | BORD     |
| 253 | 1 | 54.5 | POSITIVE | 4.5  | POSITIVE |
| 254 | 1 | 71.7 | POSITIVE | 2.7  | POSITIVE |
| 198 | 2 | 91.9 | POSITIVE | 17.2 | POSITIVE |
| 200 | 2 | 97.5 | POSITIVE | 25.0 | POSITIVE |
| 202 | 2 | 90.3 | POSITIVE | 21.0 | POSITIVE |
| 204 | 2 | 96.9 | POSITIVE | 25.6 | POSITIVE |
| 205 | 2 | 81.8 | POSITIVE | 11.4 | POSITIVE |
| 206 | 2 | 94.2 | POSITIVE | 22.2 | POSITIVE |
| 207 | 2 | 94.2 | POSITIVE | 23.6 | POSITIVE |
| 208 | 2 | 48.8 | POSITIVE | 4.0  | POSITIVE |
| 209 | 2 | 80.4 | POSITIVE | 13.7 | POSITIVE |
| 210 | 2 | 22.0 | NEGATIVE | 1.1  | BORD     |
| 211 | 2 | 84.0 | POSITIVE | 15.6 | POSITIVE |
| 214 | 2 | 77.0 | POSITIVE | 7.0  | POSITIVE |
| 215 | 2 | 82.9 | POSITIVE | 16.3 | POSITIVE |
| 216 | 2 | 96.5 | POSITIVE | 26.5 | POSITIVE |
| 218 | 2 | 19.3 | NEGATIVE | 0.5  | NEGATIVE |
| 219 | 2 | 94.8 | POSITIVE | 24.5 | POSITIVE |
| 220 | 2 | 93.0 | POSITIVE | 25.2 | POSITIVE |

|     |   |      |          |      |          |
|-----|---|------|----------|------|----------|
| 221 | 2 | 86.1 | POSITIVE | 13.2 | POSITIVE |
| 223 | 2 | 95.6 | POSITIVE | 21.3 | POSITIVE |
| 224 | 2 | 83.4 | POSITIVE | 8.6  | POSITIVE |
| 226 | 2 | 91.1 | POSITIVE | 9.2  | POSITIVE |
| 227 | 2 | 90.9 | POSITIVE | 9.8  | POSITIVE |
| 240 | 2 | 95.9 | POSITIVE | 25.0 | POSITIVE |
| 255 | 2 | 46.6 | POSITIVE | 1.1  | BORD     |
| 256 | 2 | 84.6 | POSITIVE | 12.9 | POSITIVE |
| 257 | 2 | 97.7 | POSITIVE | 23.2 | POSITIVE |
| 258 | 2 | 96.7 | POSITIVE | 23.8 | POSITIVE |
| 259 | 2 | 93.6 | POSITIVE | 17.8 | POSITIVE |
| 260 | 2 | 94.6 | POSITIVE | 23.1 | POSITIVE |
| 261 | 2 | 37.6 | POSITIVE | 17.6 | POSITIVE |
| 262 | 2 | 96.5 | POSITIVE | 26.1 | POSITIVE |
| 263 | 2 | 94.5 | POSITIVE | 25.8 | POSITIVE |
| 264 | 2 | 78.4 | POSITIVE | 10.9 | POSITIVE |
| 265 | 2 | 16.4 | NEGATIVE | 0.6  | NEGATIVE |
| 266 | 2 | 36.6 | POSITIVE | 1.4  | POSITIVE |
| 267 | 2 | 89.2 | POSITIVE | 13.8 | POSITIVE |
| 268 | 2 | 19.2 | NEGATIVE | 1.3  | POSITIVE |
| 269 | 3 | 95.4 | POSITIVE | 25.0 | POSITIVE |
| 270 | 3 | 98.1 | POSITIVE | 25.0 | POSITIVE |
| 271 | 3 | 97.4 | POSITIVE | 18.8 | POSITIVE |
| 272 | 3 | 95.2 | POSITIVE | 15.3 | POSITIVE |
| 273 | 3 | 98.2 | POSITIVE | 21.7 | POSITIVE |
| 274 | 3 | 98.1 | POSITIVE | 25.0 | POSITIVE |
| 275 | 3 | 53.6 | POSITIVE | 5.4  | POSITIVE |
| 276 | 3 | 96.1 | POSITIVE | 23.0 | POSITIVE |
| 277 | 3 | 97.8 | POSITIVE | 22.6 | POSITIVE |
| 278 | 3 | 97.6 | POSITIVE | 23.0 | POSITIVE |
| 279 | 3 | 98.0 | POSITIVE | 25.0 | POSITIVE |
| 280 | 3 | 98.1 | POSITIVE | 25.0 | POSITIVE |
| 281 | 3 | 98.0 | POSITIVE | 22.2 | POSITIVE |
| 282 | 3 | 97.7 | POSITIVE | 22.6 | POSITIVE |
| 283 | 3 | 98.0 | POSITIVE | 25.0 | POSITIVE |
| 284 | 3 | 98.0 | POSITIVE | 21.0 | POSITIVE |
| 285 | 3 | 98.0 | POSITIVE | 23.1 | POSITIVE |
| 286 | 3 | 98.2 | POSITIVE | 25.0 | POSITIVE |
| 287 | 3 | 98.2 | POSITIVE | 25.0 | POSITIVE |
| 288 | 3 | 97.7 | POSITIVE | 19.7 | POSITIVE |
| 289 | 3 | 98.1 | POSITIVE | 25.0 | POSITIVE |

|     |   |      |          |      |          |
|-----|---|------|----------|------|----------|
| 290 | 3 | 98.0 | POSITIVE | 21.8 | POSITIVE |
| 291 | 3 | 98.1 | POSITIVE | 23.0 | POSITIVE |
| 292 | 3 | 98.1 | POSITIVE | 22.9 | POSITIVE |
| 293 | 3 | 97.5 | POSITIVE | 18.2 | POSITIVE |
| 294 | 3 | 98.2 | POSITIVE | 25.0 | POSITIVE |
| 295 | 3 | 98.1 | POSITIVE | 25.0 | POSITIVE |
| 296 | 3 | 98.0 | POSITIVE | 23.0 | POSITIVE |
| 297 | 3 | 98.2 | POSITIVE | 22.0 | POSITIVE |
| 298 | 3 | 98.2 | POSITIVE | 25.0 | POSITIVE |
| 299 | 3 | 98.2 | POSITIVE | 22.6 | POSITIVE |
| 300 | 3 | 98.0 | POSITIVE | 22.7 | POSITIVE |
| 301 | 3 | 97.5 | POSITIVE | 22.7 | POSITIVE |
| 302 | 3 | 97.6 | POSITIVE | 22.6 | POSITIVE |
| 303 | 3 | 98.2 | POSITIVE | 25.0 | POSITIVE |
| 304 | 3 | 98.0 | POSITIVE | 25.0 | POSITIVE |
| 305 | 3 | 98.0 | POSITIVE | 23.1 | POSITIVE |
| 306 | 3 | 98.1 | POSITIVE | 23.1 | POSITIVE |
| 307 | 3 | 98.2 | POSITIVE | 25.0 | POSITIVE |
| 308 | 3 | 98.1 | POSITIVE | 25.0 | POSITIVE |
| 309 | 3 | 98.2 | POSITIVE | 23.2 | POSITIVE |
| 310 | 3 | 98.2 | POSITIVE | 25.0 | POSITIVE |
| 311 | 3 | 97.9 | POSITIVE | 23.2 | POSITIVE |
| 312 | 3 | 98.2 | POSITIVE | 25.0 | POSITIVE |
| 313 | 3 | 96.5 | POSITIVE | 19.6 | POSITIVE |
| 314 | 3 | 93.1 | POSITIVE | 16.5 | POSITIVE |
| 315 | 3 | 98.2 | POSITIVE | 22.7 | POSITIVE |
| 316 | 3 | 98.1 | POSITIVE | 22.9 | POSITIVE |
| 317 | 3 | 96.4 | POSITIVE | 19.4 | POSITIVE |
| 318 | 3 | 98.0 | POSITIVE | 22.2 | POSITIVE |
| 319 | 3 | 97.5 | POSITIVE | 25.0 | POSITIVE |
| 320 | 3 | 98.0 | POSITIVE | 25.0 | POSITIVE |
| 321 | 3 | 90.7 | POSITIVE | 21.0 | POSITIVE |
| 322 | 3 | 98.2 | POSITIVE | 25.0 | POSITIVE |
| 323 | 3 | 98.0 | POSITIVE | 23.3 | POSITIVE |
| 324 | 3 | 98.1 | POSITIVE | 25.0 | POSITIVE |
| 325 | 3 | 97.5 | POSITIVE | 23.1 | POSITIVE |
| 326 | 3 | 98.2 | POSITIVE | 25.0 | POSITIVE |
| 327 | 4 | 90.4 | POSITIVE | 9.5  | POSITIVE |
| 328 | 4 | 98.1 | POSITIVE | 15.0 | POSITIVE |
| 329 | 4 | 34.7 | POSITIVE | 1.9  | POSITIVE |
| 330 | 4 | 96.2 | POSITIVE | 12.1 | POSITIVE |



|     |   |      |          |      |          |
|-----|---|------|----------|------|----------|
| 331 | 4 | 19.0 | NEGATIVE | 1.6  | POSITIVE |
| 332 | 4 | 36.1 | POSITIVE | 1.7  | POSITIVE |
| 333 | 4 | 81.4 | POSITIVE | 5.9  | POSITIVE |
| 334 | 4 | 90.1 | POSITIVE | 11.1 | POSITIVE |
| 335 | 4 | 44.8 | POSITIVE | 1.6  | POSITIVE |
| 336 | 4 | 44.9 | POSITIVE | 2.4  | POSITIVE |
| 337 | 4 | 97.3 | POSITIVE | 12.3 | POSITIVE |
| 338 | 4 | 94.6 | POSITIVE | 11.8 | POSITIVE |
| 339 | 4 | 97.4 | POSITIVE | 12.4 | POSITIVE |
| 340 | 4 | 83.3 | POSITIVE | 10.1 | POSITIVE |
| 341 | 4 | 86.7 | POSITIVE | 7.5  | POSITIVE |
| 342 | 4 | 95.8 | POSITIVE | 10.5 | POSITIVE |
| 343 | 4 | 52.0 | POSITIVE | 11.3 | POSITIVE |
| 344 | 4 | 51.7 | POSITIVE | 11.0 | POSITIVE |
| 345 | 4 | 87.4 | POSITIVE | 4.5  | POSITIVE |
| 346 | 4 | 84.2 | POSITIVE | 4.7  | POSITIVE |
| 347 | 4 | 86.7 | POSITIVE | 5.1  | POSITIVE |
| 348 | 4 | 81.9 | POSITIVE | 4.0  | POSITIVE |
| 349 | 4 | 90.3 | POSITIVE | 5.8  | POSITIVE |
| 350 | 4 | 74.7 | POSITIVE | 2.7  | POSITIVE |
| 351 | 4 | 88.8 | POSITIVE | 7.6  | POSITIVE |
| 352 | 4 | 95.6 | POSITIVE | 11.3 | POSITIVE |
| 353 | 4 | 85.1 | POSITIVE | 6.7  | POSITIVE |
| 354 | 4 | 95.5 | POSITIVE | 6.4  | POSITIVE |
| 355 | 4 | 94.7 | POSITIVE | 8.9  | POSITIVE |
| 356 | 4 | 95.5 | POSITIVE | 7.1  | POSITIVE |
| 357 | 4 | 91.3 | POSITIVE | 7.8  | POSITIVE |

538  
539  
540  
541  
542  
543  
544  
545  
546  
547  
548  
549

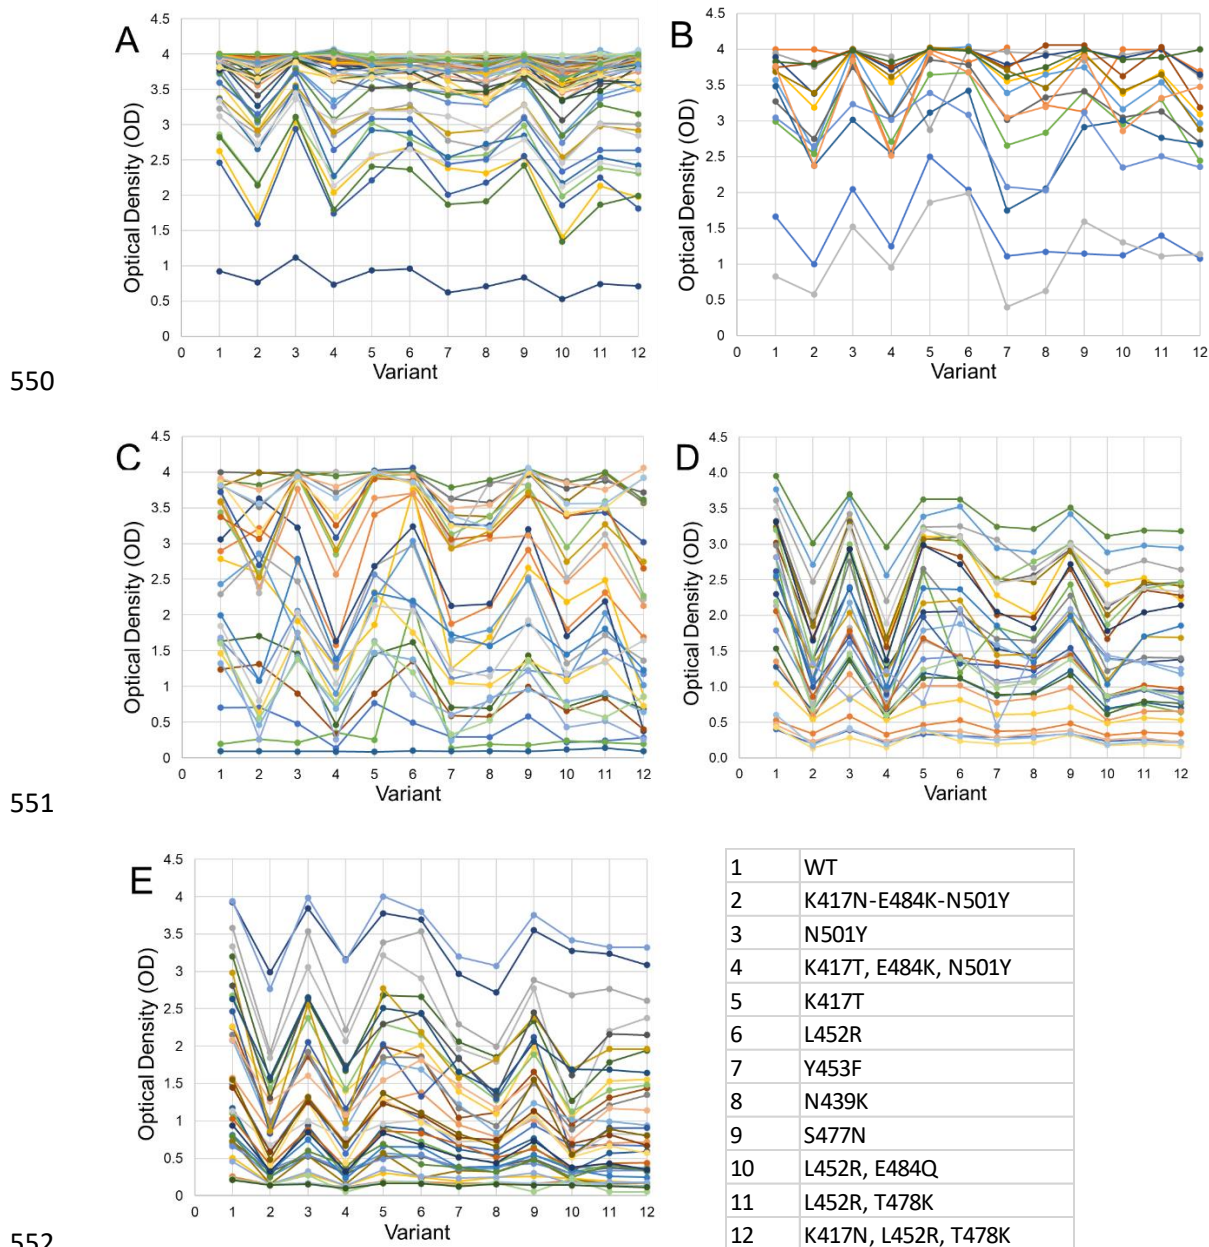

553 **Figure S1.** Individual variability in vaccine and convalescence sera reactivity to WT SARS-CoV-2 RBD antigen  
 554 and antigens bearing mutations. Each line represents the optical density values from an individual donor.  
 555 **A.** Vaccinated, **B.** ICU patients 10+ days, **C.** ICU patients 2-7 days, **D.** NIBSC/WHO (WHO) panel, **E.**  
 556 Ambulatory and hospitalized (but not critically ill) population (AHP) panel.

557

## Descriptives

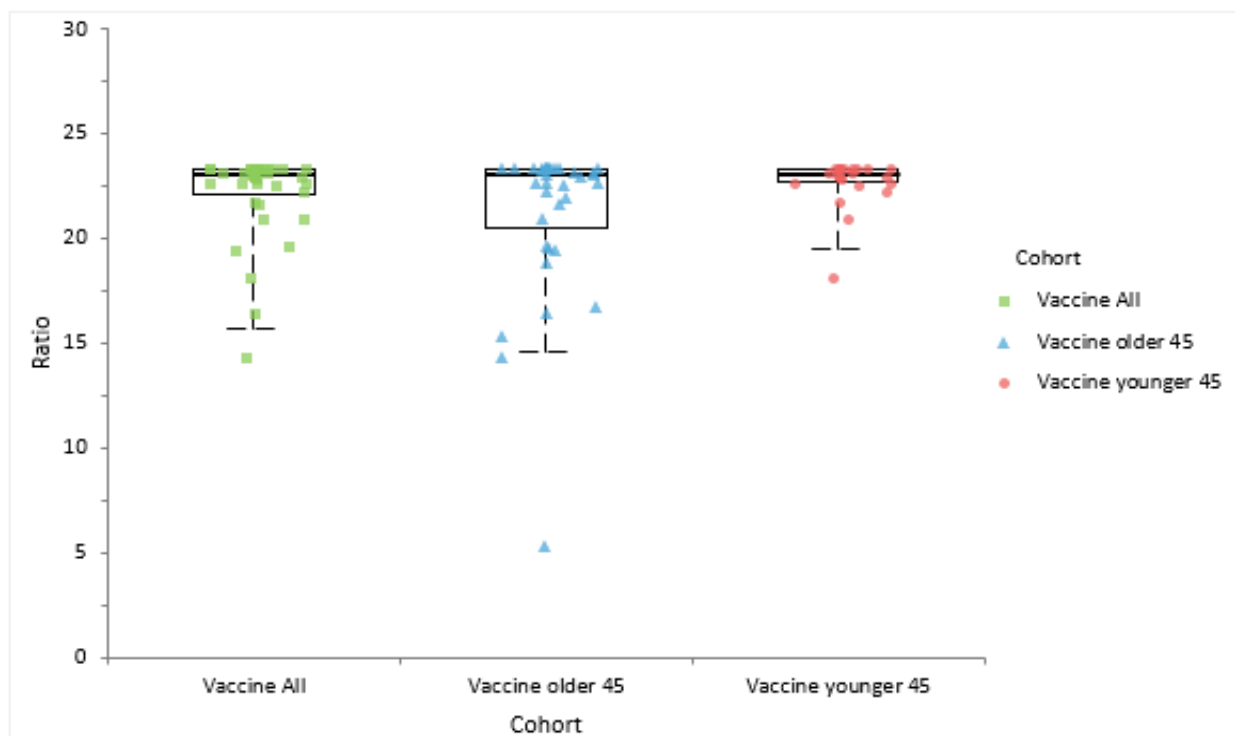

## Multiple Comparisons

Steel-Dwass-Critchlow-Fligner all pairs comparisons

| Contrast                              | Hodges-Lehmann location shift | Simultaneous 95% CI         | 0 | p-value     |
|---------------------------------------|-------------------------------|-----------------------------|---|-------------|
| Vaccine younger 45 - Vaccine older 45 | 0.000000000                   | -0.147000000 to 0.819000000 |   | 1<br>0.6255 |
| Vaccine younger 45 - Vaccine All      | 0.000000000                   | -0.150000000 to 0.385615160 |   | 1<br>0.8101 |
| Vaccine All - Vaccine older 45        | 0.000000000                   | -0.179000000 to 0.378615160 |   | 1<br>0.8940 |

H0:  $\theta = 0$

The shift in location between the distributions of the populations is equal to 0.

H1:  $\theta \neq 0$

The shift in location between the distributions of the populations is not equal to 0.

<sup>1</sup> Do not reject the null hypothesis at the 5% significance level.

558

559

560

561

562

563

**Figure S2.** Reactivity of sera from vaccinated individuals (Vaccine) to a recombinant antigen comprising the RBD of wild type (WT) SARS-CoV-2. The vaccine results were split in those older or younger than 45 years. The median is plotted as a line. The box represents 1st to 3rd quartiles and the whiskers the minimum and maximum of the 95% confidence interval.

564

## Descriptives

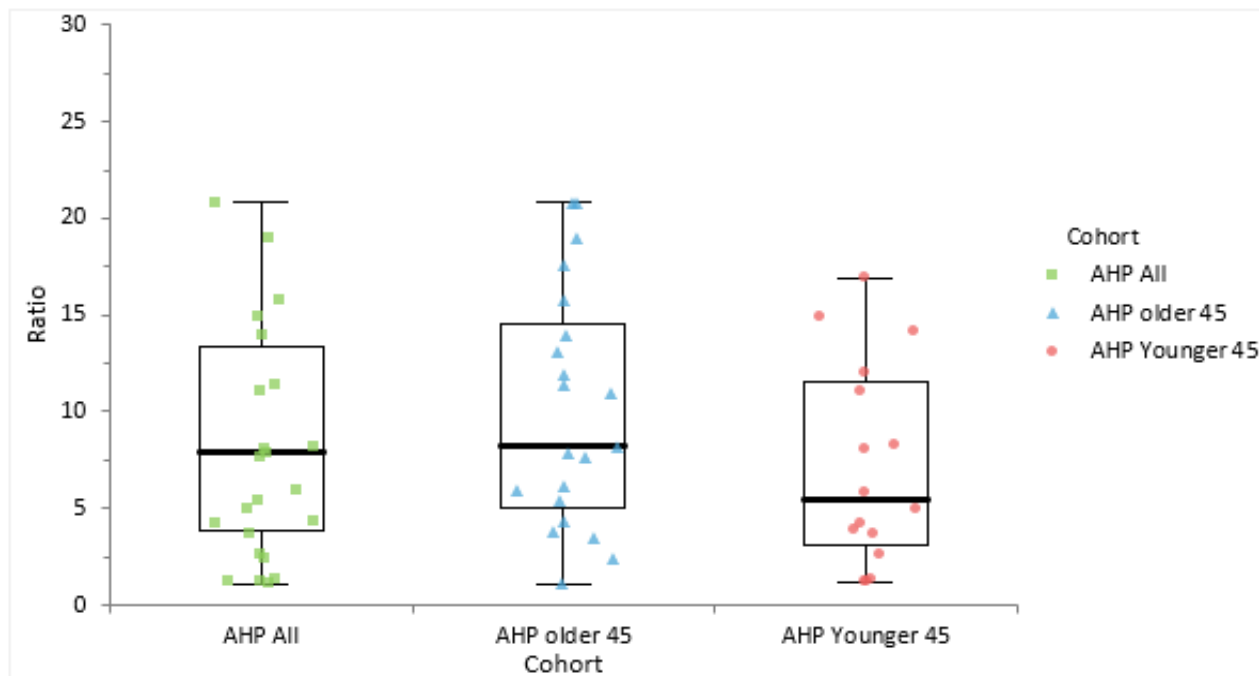

## Multiple Comparisons

Steel-Dwass-Critchlow-Fligner all pairs comparisons

| Contrast                 | Hodges-Lehmann location shift | Simultaneous 95% CI | 0 | p-value             |
|--------------------------|-------------------------------|---------------------|---|---------------------|
| AHP older 45             | 2.7155                        | -1.9120 to 7.7000   |   | 0.3516 <sup>1</sup> |
| AHP All - AHP Younger 45 | 1.3850                        | -2.4930 to 5.8180   |   | 0.6579              |
| AHP older 45             | 1.1970                        | -2.7640 to 5.2150   |   | 0.7467 <sup>1</sup> |

H0:  $\theta = 0$

The shift in location between the distributions of the populations is equal to 0.

H1:  $\theta \neq 0$

The shift in location between the distributions of the populations is not equal to 0.

<sup>1</sup> Do not reject the null hypothesis at the 5% significance level.

565

566 **Figure S3.** Reactivity of sera from ambulatory and hospitalized, but not critically ill, population (AHP), to a  
 567 recombinant antigen comprising the RBD of wild type (WT) SARS-CoV-2. The AHP results were split in those  
 568 older or younger than 45 years. The median is plotted as a line. The box represents 1st to 3rd quartiles and the  
 569 whiskers the minimum and maximum of the 95% confidence interval.

570
